# Supplementary material for: Evaluation of Post-Operative Outcomes of Femoral Neck Fracture Interventions: A Systematic Review
Source: PubMed Central journal article supplement — Geriatr Orthop Surg Rehabil. 2024 Nov 15;15:21514593241273326. doi: 10.1177/21514593241273326 (PMC11569500; doi:10.1177/21514593241273326), 2024-11-15
Supplement: sj-pdf-3-gos-10.1177_21514593241273326.pdf [file sj-pdf-3-gos-10.1177_21514593241273326.pdf]

## SUPPLEMENTAL MATERIAL

Supplemental Tables 1 to 5 and corresponding references

### Supplemental Table 1. Search terms

| Search term                                                                                                                                                                                                                                                                                                                                                                                                                                                                                                                                                                                               | Date       | Database |
|-----------------------------------------------------------------------------------------------------------------------------------------------------------------------------------------------------------------------------------------------------------------------------------------------------------------------------------------------------------------------------------------------------------------------------------------------------------------------------------------------------------------------------------------------------------------------------------------------------------|------------|----------|
| (((((Femoral neck fracture OR FNF)) AND ((Dynamic hip screw OR Cannulated screw OR Sliding hip screw OR Femoral neck system OR Dynamic Locking Plate OR Cannulated OR Sliding Hip Screws OR Dhs OR FNS OR Screw Fixation OR Internal Fixation)) AND ((Complications OR Bleeding OR Reoperation OR Complication OR "length of stay" OR Postoperative OR "Intraoperative Blood Loss" OR Hospitalization OR necrosis))) AND (("2012"[Date - Publication] : "3000"[Date - Publication]))) AND ((prospective OR retrospective OR series OR randomized OR registry OR cohort)) AND (patient OR case OR subject) | 10/10/2022 | PubMed   |
| ((("Femoral neck fracture" OR "ipsilateral femoral neck fracture") AND (("Dynamic hip screw" OR "Cannulated screw" OR "Sliding hip screw" OR "Dynamic Locking Plate" OR Cannulated OR Sliding Hip Screws OR "Screw Fixation" OR "Internal Fixation" OR Dhs)) AND (Complications OR Bleeding OR Reoperation) NOT (case report))                                                                                                                                                                                                                                                                            | 10/10/2022 | PubMed   |
| ((Femoral neck fracture OR "ipsilateral femoral neck fracture" OR "Femoral Neck Fractures" OR FNF OR Femoral neck shaft fracture) AND (("Dynamic hip screw" OR "Cannulated screw" OR "Sliding hip screw" OR                                                                                                                                                                                                                                                                                                                                                                                               | 10/10/2022 | PubMed   |

|                                                                                                                                                                                                                                                                                                                                                                                                                                             |            |                  |
|---------------------------------------------------------------------------------------------------------------------------------------------------------------------------------------------------------------------------------------------------------------------------------------------------------------------------------------------------------------------------------------------------------------------------------------------|------------|------------------|
| <p>Dynamic Locking Plate OR Cannulated OR Sliding Hip Screws OR Screw Fixation OR Internal Fixation OR Dhs) AND (FNS OR Femoral neck system)) AND ((Complications OR Bleeding OR Reoperation OR "Operation Time" OR "Operating room time" OR Complication OR length of stay OR Postoperative OR "Intraoperative Blood Loss" OR Hospitalization)) NOT (case report))</p>                                                                     |            |                  |
| <p>((Femoral neck fracture OR Femoral Neck Fractures OR femoral neck shaft fracture OR ipsilateral femoral neck fracture)) AND ((Dynamic hip screw OR Cannulated screw OR Sliding hip screw OR Femoral neck system OR FNS OR Dynamic Locking Plate OR Cannulated OR Sliding Hip Screws)) AND ((Complications OR Bleeding OR Reoperation OR Operation Time OR Time)) AND ("2019/01/01"[Date - Publication] : "3000"[Date - Publication])</p> | 10/10/2022 | PubMed           |
| <p>((Femoral neck fracture OR Femoral Neck Fractures)) AND ((Dynamic hip screw OR Cannulated screw OR Sliding hip screw OR Femoral neck system OR Dynamic Locking Plate OR Cannulated OR Sliding Hip Screws)) AND ((Complications OR Bleeding OR Reoperation OR Operation Time OR Time)) AND ("2019/01/01"[Date - Publication] : "3000"[Date - Publication])</p>                                                                            | 10/10/2022 | PubMed           |
| <p>(Femoral neck fracture OR FNF) AND (Dynamic hip screw OR Cannulated screw OR Sliding hip screw OR Femoral neck system OR Dynamic Locking Plate OR Cannulated OR Sliding Hip Screws OR Dhs OR FNS OR Screw Fixation OR Internal Fixation) AND (Complications OR Bleeding</p>                                                                                                                                                              | 10/10/2022 | Cochrane Library |

|                                                                                                                                                                                                                                                                                                                                                                                                                                                                                                                                                                                     |                   |                         |
|-------------------------------------------------------------------------------------------------------------------------------------------------------------------------------------------------------------------------------------------------------------------------------------------------------------------------------------------------------------------------------------------------------------------------------------------------------------------------------------------------------------------------------------------------------------------------------------|-------------------|-------------------------|
| <p>OR Reoperation OR Complication OR "length of stay" OR Postoperative OR "Intraoperative Blood Loss" OR Hospitalization OR necrosis) AND (prospective OR retrospective OR series OR randomized OR registry OR cohort) AND (patient OR case OR subject)</p>                                                                                                                                                                                                                                                                                                                         |                   |                         |
| <p>((("Femoral neck fracture" OR "ipsilateral femoral neck fracture") AND (("Dynamic hip screw" OR "Cannulated screw" OR "Sliding hip screw" OR "Dynamic Locking Plate" OR Cannulated OR Sliding Hip Screws OR "Screw Fixation" OR "Internal Fixation" OR Dhs)) AND (Complications OR Bleeding OR Reoperation) NOT (case report))</p>                                                                                                                                                                                                                                               | <p>10/10/2022</p> | <p>Cochrane Library</p> |
| <p>((Femoral neck fracture OR "ipsilateral femoral neck fracture" OR "Femoral Neck Fractures" OR FNF OR Femoral neck shaft fracture) AND (("Dynamic hip screw" OR "Cannulated screw" OR "Sliding hip screw" OR Dynamic Locking Plate OR Cannulated OR Sliding Hip Screws OR Screw Fixation OR Internal Fixation OR Dhs) AND (FNS OR Femoral neck system)) AND ((Complications OR Bleeding OR Reoperation OR "Operation Time" OR "Operating room time" OR Complication OR length of stay OR Postoperative OR "Intraoperative Blood Loss" OR Hospitalization)) NOT (case report))</p> | <p>10/10/2022</p> | <p>Cochrane Library</p> |
| <p>((Femoral neck fracture OR Femoral Neck Fractures OR femoral neck shaft fracture OR ipsilateral femoral neck fracture)) AND ((Dynamic hip screw OR Cannulated screw OR Sliding hip screw OR Femoral neck system OR FNS OR Dynamic Locking Plate OR Cannulated OR Sliding Hip</p>                                                                                                                                                                                                                                                                                                 | <p>10/10/2022</p> | <p>Cochrane Library</p> |

|                                                                                                                                                                                                                                                                                                                                                                                                                                                                                                                                                                                                                       |            |                  |
|-----------------------------------------------------------------------------------------------------------------------------------------------------------------------------------------------------------------------------------------------------------------------------------------------------------------------------------------------------------------------------------------------------------------------------------------------------------------------------------------------------------------------------------------------------------------------------------------------------------------------|------------|------------------|
| Screws)) AND ((Complications OR Bleeding OR Reoperation OR Operation Time OR Time))                                                                                                                                                                                                                                                                                                                                                                                                                                                                                                                                   |            |                  |
| ('femoral neck fracture' OR fnf) AND ('dynamic hip screw' OR 'cannulated screw' OR 'sliding hip screw' OR 'femoral neck system' OR 'dynamic locking plate' OR cannulated OR 'sliding hip screws' OR dhs OR fns OR 'screw fixation' OR 'internal fixation') AND (complications OR bleeding OR reoperation OR complication OR 'length of stay' OR postoperative OR 'intraoperative blood loss' OR hospitalization OR necrosis) AND (prospective OR retrospective OR series OR randomized OR registry OR cohort) AND (patient OR case OR subject) AND [humans]/lim AND [english]/lim AND [embase]/lim AND [2012-2022]/py | 10/10/2022 | Embase           |
| ('femoral neck fracture' OR fnf) AND ('dynamic hip screw' OR 'cannulated screw' OR 'sliding hip screw' OR 'femoral neck system' OR 'dynamic locking plate' OR cannulated OR 'sliding hip screws' OR dhs OR fns OR 'screw fixation' OR 'internal fixation') AND (complications OR bleeding OR reoperation OR complication OR 'length of stay' OR postoperative OR 'intraoperative blood loss' OR hospitalization OR necrosis) AND (prospective OR retrospective OR series OR randomized OR registry OR cohort) AND (patient OR case OR subject) AND [humans]/lim AND [english]/lim AND [embase]/lim AND [2012-2022]/py | 09/21/2022 | Embase           |
| ((Femoral neck fracture OR Femoral Neck Fractures OR femoral neck shaft fracture OR ipsilateral femoral neck fracture)) AND ((Dynamic hip screw OR Cannulated screw                                                                                                                                                                                                                                                                                                                                                                                                                                                   | 09/21/2022 | Cochrane Library |

|                                                                                                                                                                                                                                                                                                                                                                                                                                                                                                                                                                                    |                   |                         |
|------------------------------------------------------------------------------------------------------------------------------------------------------------------------------------------------------------------------------------------------------------------------------------------------------------------------------------------------------------------------------------------------------------------------------------------------------------------------------------------------------------------------------------------------------------------------------------|-------------------|-------------------------|
| <p>OR Sliding hip screw OR Femoral neck system OR FNS OR Dynamic Locking Plate OR Cannulated OR Sliding Hip Screws)) AND ((Complications OR Bleeding OR Reoperation OR Operation Time OR Time)) in Title Abstract Keyword</p>                                                                                                                                                                                                                                                                                                                                                      |                   |                         |
| <p>((Femoral neck fracture OR "ipsilateral femoral neck fracture" OR "Femoral Neck Fractures" OR FNF OR Femoral neck shaft fracture) AND ("Dynamic hip screw" OR "Cannulated screw" OR "Sliding hip screw" OR Dynamic Locking Plate OR Cannulated OR Sliding Hip Screws OR Screw Fixation OR Internal Fixation OR Dhs) AND (FNS OR Femoral neck system)) AND ((Complications OR Bleeding OR Reoperation OR "Operation Time" OR "Operating room time" OR Complication OR length of stay OR Postoperative OR "Intraoperative Blood Loss" OR Hospitalization)) NOT (case report))</p> | <p>09/21/2022</p> | <p>Cochrane Library</p> |
| <p>(("Femoral neck fracture" OR "ipsilateral femoral neck fracture") AND ("Dynamic hip screw" OR "Cannulated screw" OR "Sliding hip screw" OR "Dynamic Locking Plate" OR Cannulated OR Sliding Hip Screws OR "Screw Fixation" OR "Internal Fixation" OR Dhs)) AND (Complications OR Bleeding OR Reoperation) NOT (case report)) in Title Abstract Keyword</p>                                                                                                                                                                                                                      | <p>09/21/2022</p> | <p>Cochrane Library</p> |
| <p>(Femoral neck fracture OR FNF) AND (Dynamic hip screw OR Cannulated screw OR Sliding hip screw OR Femoral neck system OR Dynamic Locking Plate OR Cannulated OR Sliding Hip Screws OR Dhs OR FNS OR Screw Fixation OR Internal Fixation) AND (Complications OR Bleeding</p>                                                                                                                                                                                                                                                                                                     | <p>09/21/2022</p> | <p>Cochrane Library</p> |

|                                                                                                                                                                                                                                                                                |  |  |
|--------------------------------------------------------------------------------------------------------------------------------------------------------------------------------------------------------------------------------------------------------------------------------|--|--|
| OR Reoperation OR Complication OR "length of stay" OR Postoperative OR "Intraoperative Blood Loss" OR Hospitalization OR necrosis) AND (prospective OR retrospective OR series OR randomized OR registry OR cohort) AND (patient OR case OR subject) in Title Abstract Keyword |  |  |
|--------------------------------------------------------------------------------------------------------------------------------------------------------------------------------------------------------------------------------------------------------------------------------|--|--|

**Supplemental Table 2.** Criteria for risk of bias ratings

| <b>Risk of Bias Rating</b> | <b>Criteria</b>                                                                       |
|----------------------------|---------------------------------------------------------------------------------------|
| Low                        | Selection: 3-4 stars<br>AND<br>Comparability: 1-2 stars<br>AND<br>Outcomes: 2-3 stars |
| Moderate                   | Selection: 2 stars<br>AND<br>Comparability: 1-2 stars<br>AND<br>Outcomes: 2-3         |
| Poor                       | Selection: 0-1<br>OR<br>Comparability: 0<br>OR<br>Outcomes: 0-1                       |

**Supplemental Table 3.** Patient baseline characteristics for included studies

| <b>Study</b>           | <b>Intervention</b> | <b>N</b> | <b>Age (years)</b> | <b>p value</b>     | <b>Garden Classification*</b> | <b>p value</b>             | <b>Follow-up (months)</b> | <b>p value</b> |
|------------------------|---------------------|----------|--------------------|--------------------|-------------------------------|----------------------------|---------------------------|----------------|
| He, 2021 <sup>13</sup> | Cannulated screw    | 36       | 47.58±10.31        | 0.228 <sup>†</sup> | Type I: 5.6% (2/36)           | Type I: 0.939 <sup>‡</sup> | 16.91±3.01 (range: 12-    | --             |

|                          |                     |    |            |                    |                                                                                                  |                                                                                            |             |                    |
|--------------------------|---------------------|----|------------|--------------------|--------------------------------------------------------------------------------------------------|--------------------------------------------------------------------------------------------|-------------|--------------------|
|                          |                     |    |            |                    | Type II: 25.0% (9/36)<br>Type III: 55.6% (20/36)<br>Type IV: 13.9% (5/36)                        | Type II: 0.942 <sup>‡</sup><br>Type III: 0.866 <sup>‡</sup><br>Type IV: 0.847 <sup>‡</sup> | 24)         |                    |
|                          | FNS (DePuy Synthes) | 33 | 50.61±10.3 |                    | Type I: 3.0% (1/33)<br>Type II: 24.2% (8/33)<br>Type III: 57.6% (19/33)<br>Type IV: 15.2% (5/33) |                                                                                            |             |                    |
| Hu, 2021 <sup>14</sup>   | Cannulated screw    | 24 | 50.46±9.26 | 0.998 <sup>†</sup> | Type I: 16.7% (4/24)<br>Type II: 25.0% (6/24)<br>Type III: 29.2% (7/24)<br>Type IV: 29.2% (7/24) | --                                                                                         | Minimum: 12 |                    |
|                          | FNS (DePuy Synthes) | 20 | 50.45±8.45 |                    | Type I: 0.0% (0/20)<br>Type II: 30.0% (6/20)<br>Type III: 40.0% (8/20)<br>Type IV: 30.0% (6/20)  |                                                                                            |             |                    |
| Nibe, 2021 <sup>15</sup> | Cannulated screw    | 27 | 77.8±7.3   | 0.11 <sup>†</sup>  | --                                                                                               | --                                                                                         | 24±27       | 0.056 <sup>†</sup> |
|                          | FNS (DePuy)         | 25 | 81.2±7.9   |                    | --                                                                                               |                                                                                            | 13±5        |                    |

|                             |                              |    |                         |                    |                                                                                                       |                    |                         |    |
|-----------------------------|------------------------------|----|-------------------------|--------------------|-------------------------------------------------------------------------------------------------------|--------------------|-------------------------|----|
|                             | Synthes)                     |    |                         |                    |                                                                                                       |                    |                         |    |
| Tang, 2021 <sup>19</sup>    | Cannulated screw             | 45 | 54.8±11.7               | 0.44 <sup>†</sup>  | Type I: 0.0% (0/45)<br>Type II: 11.1% (5/45)<br>Type III: 68.9% (31/45)<br>Type IV: 20.0% (9/45)      | 0.762 <sup>‡</sup> | Range: 14-24            | -- |
|                             | FNS (DePuy Synthes)          | 47 | 57.4±15                 |                    | Type I: 0.0% (0/47)<br>Type II: 12.8% (6/47)<br>Type III: 61.7% (29/47)<br>Type IV: 25.5% (12/47)     |                    |                         |    |
| Vazquez, 2021 <sup>20</sup> | Cannulated screw             | 32 | 85±6.6 (79.8-90)        | 0.48 <sup>#</sup>  | Type I: 85.7% (54/63)<br>Type II: 14.3% (9/63)                                                        | --                 | Range: 30 days-6 months | -- |
|                             | Dynamic or Sliding hip screw | 16 | 83.4±7.3 81 (77.8-88.8) |                    |                                                                                                       |                    |                         |    |
|                             | FNS (DePuy Synthes)          | 15 | 86.1±4.6 87 (85-88.5)   |                    |                                                                                                       |                    |                         |    |
| Zhang, 2022 <sup>22</sup>   | Cannulated screw             | 36 | 52.5±10.72              | 0.065 <sup>†</sup> | Type I: 0.0% (0/36)<br>Type II: 33.33% (12/36)<br>Type III: 38.89% (14/36)<br>Type IV: 27.78% (10/36) | 0.689 <sup>‡</sup> | 6                       | -- |



|                              |                              |     |             |                    |                                                                                                       |                    |                                    |                   |
|------------------------------|------------------------------|-----|-------------|--------------------|-------------------------------------------------------------------------------------------------------|--------------------|------------------------------------|-------------------|
|                              | FNS (DePuy Synthes)          | 33  | 57.61±11.87 |                    | Type I: 0.00% (0/33)<br>Type II: 30.30% (10/33)<br>Type III: 27.27% (9/33)<br>Type IV: 42.42% (14/33) |                    |                                    |                   |
| Zhou, 2021 <sup>23</sup>     | Cannulated screw             | 51  | 53.14±7.19  | >0.05 <sup>†</sup> | --                                                                                                    | --                 | Range: 10-22                       | --                |
|                              | FNS (DePuy Synthes)          | 30  | 54.53±6.71  |                    | --                                                                                                    |                    |                                    |                   |
| Niemann, 2022 <sup>16</sup>  | Dynamic or Sliding hip screw | 19  | 60.47±17    | 0.34 <sup>¶</sup>  | Type I: 10.5% (2/19)<br>Type II: 47.4% (9/19)<br>Type III: 21.1% (4/19)<br>Type IV: 21.1% (4/19)      | 0.45 <sup>§</sup>  | 7.35±3.43 (95% CI: 5.59-9.12) days | 0.94 <sup>¶</sup> |
|                              | FNS (DePuy Synthes)          | 12  | 66.5±10.98  |                    | Type I: 8.3% (1/12)<br>Type II: 66.7% (8/12)<br>Type III: 16.7% (2/12)<br>Type IV: 8.3% (1/12)        |                    |                                    |                   |
| Schuetze, 2022 <sup>17</sup> | Dynamic or Sliding hip screw | 108 | 68.5±15.1   | >0.05 <sup>¶</sup> | Type I: 20.4% (22/108)<br>Type II: 45.4% (49/108)<br>Type III: 26.9%                                  | 0.617 <sup>‡</sup> | 13                                 | --                |

|                                |                              |     |           |                    |                                                                                                                     |                    |                             |                     |
|--------------------------------|------------------------------|-----|-----------|--------------------|---------------------------------------------------------------------------------------------------------------------|--------------------|-----------------------------|---------------------|
|                                |                              |     |           |                    | (29/108)<br>Type IV: 7.4%<br>(8/108)                                                                                |                    |                             |                     |
|                                | FNS (DePuy Synthes)          | 113 | 70.6±14.9 |                    | Type I: 14.2%<br>(16/113)<br>Type II: 49.6%<br>(56/113)<br>Type III: 26.5%<br>(30/113)<br>Type IV: 9.7%<br>(11/113) |                    |                             |                     |
| Xu, 2022 <sup>21</sup>         | Cancellous screw             | 51  | 61.6±16.4 | 0.713*<br>*        | Type I+II:<br>70.6% (36/51)<br>Type III+IV:<br>29.4% (15/51)                                                        | 0.110 <sup>‡</sup> | 14 (12-16)                  | 0.256 <sup>††</sup> |
|                                | Dynamic or Sliding hip screw | 52  | 63.1±13.2 |                    | Type I+II:<br>82.7% (43/52)<br>Type III+IV:<br>17.3% (9/52)                                                         |                    | 14.5 (12-15.75)             |                     |
|                                | FNS (DePuy Synthes)          | 54  | 60.7±15.2 |                    | Type I+II:<br>64.8% (35/54)<br>Type III+IV:<br>35.2% (19/54)                                                        |                    | 12 (10-16)                  |                     |
| Cintean, 2021 <sup>11</sup>    | FNS (DePuy Synthes)          | 29  | 79.57     | 0.767 <sup>†</sup> | Type I: 100%<br>(29/29)                                                                                             | --                 | Mean: 3.9<br>(range: 0-18)  | --                  |
|                                | Hemiarthroplasty             | 34  | 80.35     |                    | Type I: 100%<br>(34/34)                                                                                             |                    | Mean: 12.5<br>(range: 0-22) |                     |
| <b>Non-comparative Studies</b> |                              |     |           |                    |                                                                                                                     |                    |                             |                     |
| Davidson,                      | FNS (DePuy                   | 102 | 62.9±16.5 | --                 | Type I-II:                                                                                                          | --                 | Mean: 7                     | --                  |

|                             |                     |    |      |    |                                                                                                   |    |               |    |
|-----------------------------|---------------------|----|------|----|---------------------------------------------------------------------------------------------------|----|---------------|----|
| 2022 <sup>12</sup>          | Synthes)            |    |      |    | 73.5% (75/102)<br>Type III-IV:<br>26.5% (27/102)                                                  |    | (range: 3-27) |    |
| Stassen, 2021 <sup>18</sup> | FNS (DePuy Synthes) | 34 | 63±8 | -- | Type I: 2.9% (1/34)<br>Type II: 50.0% (17/34)<br>Type III: 35.3% (12/34)<br>Type IV: 11.8% (4/34) | -- | 6             | -- |

Data are expressed as mean±SD, median (IQR), or % (n) unless otherwise indicated. "--" indicates no data reported.

\*Garden classification: Type I, incomplete or valgus impacted fracture; Type II, complete fracture without bone displacement; Type III, complete fracture with partial displacement of the fracture fragments; Type IV, complete fracture with total displacement of the fracture fragments.

†Independent-samples *t*-test

‡Chi-squared test of independence

¶Mann-Whitney U test

§Fisher's exact test (Type I + II vs. Type III + IV)

||Logistic regression

#Linear regression

\*\*One-way analysis of variance

††Kruskal-Wallis test

**Supplemental Table 4.** Patient baseline characteristics for all studies, including those not reporting a femoral neck system

| Study                            | Intervention                 | N   | Age (years)  | Garden Classification*                                                                                         |
|----------------------------------|------------------------------|-----|--------------|----------------------------------------------------------------------------------------------------------------|
| <i>Randomized Control Trials</i> |                              |     |              |                                                                                                                |
| Bartels, 2022 <sup>1</sup>       | Cannulated Screw             | 51  | 64.1 ± 4.3   | --                                                                                                             |
|                                  | Total Hip Arthroplasty       | 51  | 63.4 ± 4.0   | --                                                                                                             |
| Chammout, 2012 <sup>2</sup>      | Cannulated Screw             | 57  | 79 (66-90)   | --                                                                                                             |
| FAITH <sup>3</sup>               | Cancellous Screw             | 551 | 72±12.3      | Grade I: 42.4% (277/536)<br>Grade II: 17.2% (92/536)<br>Grade III: 23.9% (128/536)<br>Grade IV: 7.3% (39/536)  |
|                                  | Dynamic or Sliding Hip Screw | 557 | 72±12        | Grade I: 48.0% (257/535)<br>Grade II: 18.5% (99/535)<br>Grade III: 22.6% (121/535)<br>Grade IV: 10.8% (58/535) |
| Griffin, 2014 <sup>4</sup>       | Cannulated Screw             | 123 | 83±7.7       | --                                                                                                             |
|                                  | Targon FN System             | 51  | 83±7.6       | --                                                                                                             |
| Kumar, 2015 <sup>5</sup>         | Cancellous Screw             | 87  | --           | Grade III: 75.86% (66/87)<br>Grade IV: 24.13% (21/87)                                                          |
| Rahman, 2022 <sup>6</sup>        | Cancellous Screw             | 11  | 52.73±9.34   | --                                                                                                             |
|                                  | Cannulated Screw             | 11  | 52.82±17.27  | --                                                                                                             |
| Siavashi, 2015 <sup>7</sup>      | Cannulated Screw             | 28  | 28 (18-58)   | --                                                                                                             |
|                                  | Dynamic or Sliding Hip Screw | 30  | 30 (18-60)   | --                                                                                                             |
| Watson, 2013 <sup>8</sup>        | Cannulated Screw             | 29  | 76.7 (53-93) | --                                                                                                             |
|                                  | Dynamic or Sliding Hip Screw | 31  | 77.9 (53-89) | --                                                                                                             |
| Wei, 2020 <sup>9</sup>           | Cannulated Screw             | 51  | 82.59±9.33   | --                                                                                                             |
| Yin, 2016 <sup>10</sup>          | Cannulated Screw             | 64  | 42.44±9.12   | Grade I: 7.8% (5/64)<br>Grade II: 54.7% (35/64)                                                                |

|                                          |                                                 |      |                   |                                                                                                       |
|------------------------------------------|-------------------------------------------------|------|-------------------|-------------------------------------------------------------------------------------------------------|
|                                          |                                                 |      |                   | Grade III: 37.5% (24/64)                                                                              |
| Zhang, 2022 <sup>11</sup>                | Multiple Cannulated Screw & Plate System        | 36   | 40.22±11.76       | Grade I: 0.0% (0/36)<br>Grade II: 22.2% (8/36)<br>Grade III: 44.4% (16/36)<br>Grade IV: 33.3% (12/36) |
|                                          | Cannulated Screw                                | 41   | 42.24±11.01       | Grade I: 0.0% (0/41)<br>Grade II: 36.6% (15/41)<br>Grade III: 48.8% (20/41)<br>Grade IV: 14.6% (6/41) |
| Zhao, 2022 <sup>12</sup>                 | Cannulated Screw                                | 21   | 59.48 (9.64)      | Grade I: 0.0% (0/21)<br>Grade II: 38.1% (8/21)<br>Grade III: 61.9% (13/21)                            |
|                                          | Bidirectional Pressurized Porous Tantalum Screw | 20   | 60.45 (11.33)     | Grade I: 15.0% (3/20)<br>Grade II: 35.0% (7/20)<br>Grade III: 50.0% (10/20)                           |
| <b><i>Comparative Study</i></b>          |                                                 |      |                   |                                                                                                       |
| Borris, 2018 <sup>13</sup>               | Dynaloc                                         | 22   | --                | --                                                                                                    |
|                                          | Cancellous Screw                                | 18   | --                | --                                                                                                    |
| Eschler, 2014 <sup>14</sup>              | Dynamic or Sliding Hip Screw                    | 25   | 67.3              | --                                                                                                    |
|                                          | Targon FN System                                | 27   | 67.3              | --                                                                                                    |
| <b><i>Cross-sectional Study</i></b>      |                                                 |      |                   |                                                                                                       |
| Ahmed, 2022 <sup>15</sup>                | Cannulated Screw                                | 35   | 32.14±10.20       | --                                                                                                    |
| <b><i>Prospective Cohort Studies</i></b> |                                                 |      |                   |                                                                                                       |
| Alshameeri, 2017 <sup>16</sup>           | Cannulated Screw                                | 1279 | 78.2 (74.3-82)    | --                                                                                                    |
|                                          | Targon FN System                                | 725  | 77.77 (76.6-78.7) | --                                                                                                    |
| Beder, 2021 <sup>17</sup>                | Dynamic or Sliding Hip Screw                    | 20   | 38.50 ±11.669     | Grade I: 20.0% (4/20)<br>Grade II: 20.0% (4/20)<br>Grade III: 15.0% (3/20)<br>Grade IV: 45.0% (9/20)  |
| Bisaccia, 2018 <sup>18</sup>             | Cannulated Screw                                | 75   | 67.8 (45-80)      | Grade I: 69.3% (52/75)<br>Grade II: 30.7% (23/75)                                                     |
|                                          | Dynamic or Sliding                              | 42   | 67.8 (45-80)      | Grade I: 69.0% (29/42)                                                                                |

|                                 |                              |      |               |                                                                                                       |
|---------------------------------|------------------------------|------|---------------|-------------------------------------------------------------------------------------------------------|
|                                 | Hip Screw                    |      |               | Grade II: 31.0% (13/42)                                                                               |
| Dong, 2019 <sup>19</sup>        | Cancellous Screw             | 30   | 55.7±7.9      | --                                                                                                    |
|                                 | Cannulated Screw             | 30   | 56.3±8.2      | --                                                                                                    |
| Duan, 2019 <sup>20</sup>        | Cannulated Screw             | 23   | 62.1±4.1      | Grade I: 8.7% (2/23)<br>Grade II: 30.4% (7/23)<br>Grade III: 39.1% (9/23)<br>Grade IV: 21.7% (5/23)   |
| Guimarães, 2017 <sup>21</sup>   | Cancellous Screw             | 20   | 38.75 (18-59) | --                                                                                                    |
| Gupta, 2016 <sup>22</sup>       | Cannulated Screw             | 45   | 39.3 (16-60)  | Grade I: 2.2% (1/45)<br>Grade II: 4.4% (2/45)<br>Grade III: 62.2% (28/45)<br>Grade IV: 31.1% (14/45)  |
|                                 | Dynamic or Sliding Hip Screw | 40   | 40.7 (16-60)  | Grade I: 0.0% (0/40)<br>Grade II: 5.0% (2/40)<br>Grade III: 57.5% (23/40)<br>Grade IV: 37.5% (15/40)  |
| Imobi Singh, 2021 <sup>23</sup> | Cannulated Screw             | 47   | 65 (45-85)    | Grade I: 4% (2/47)<br>Grade II: 28% (13/47)<br>Grade III: 8% (4/47)<br>Grade IV: 60% (28/47)          |
| Lin, 2012 <sup>24</sup>         | Cannulated Screw             | 41   | 47 (21-65)    | Grade I: 7.3% (3/41)<br>Grade II: 22.0% (9/41)<br>Grade III: 43.9% (18/41)<br>Grade IV: 26.8% (11/41) |
| Nyholm, 2018 <sup>25</sup>      | Parallel Screws              | 1206 | 73 (21-102)   | --                                                                                                    |
| Qiu, 2016 <sup>26</sup>         | Thread Needles               | 32   | (35-42)       | --                                                                                                    |
|                                 | Cancellous Screw             | 32   | (35-42)       | --                                                                                                    |
| Ramadanov, 2020 <sup>27</sup>   | Cannulated Screw             | 56   | --            | Grade I: 73.2% (41/56)<br>Grade II: 16.1% (9/56)<br>Grade III: 10.7% (6/56)                           |
| Sami, 2022 <sup>28</sup>        | Cannulated Screws            | 27   | 37.33±9.84    | Grade I: 7.40% (2/27)<br>Grade II: 3.70% (1/27)<br>Grade III: 70.37% (19/27)                          |

|                                     |                              |              |                   |                                                                                                              |
|-------------------------------------|------------------------------|--------------|-------------------|--------------------------------------------------------------------------------------------------------------|
|                                     |                              |              |                   | Grade IV: 18.52% (5/27)                                                                                      |
| Schwartzmann, 2014 <sup>29</sup>    | Dynamic or Sliding Hip Screw | 96           | 53±14 (18-70)     | Grade I: 0.0% (0/96)<br>Grade II: 13.5% (13/96)<br>Grade III: 26.0% (25/96)<br>Grade IV: 60.4% (58/96)       |
| Shu, 2020 <sup>30</sup>             | Cannulated Screw             | 26           | 67.2±10.2         | Grade I: 7.7% (2/26)<br>Grade II: 26.9% (7/26)<br>Grade III: 65.4% (17/26)                                   |
|                                     | Dynamic or Sliding Hip Screw | 28           | 65.8±10.3         | Grade I: 10.7% (3/28)<br>Grade II: 21.4% (6/28)<br>Grade III: 67.9% (19/28)                                  |
| Viberg, 2022 <sup>31</sup>          | Cannulated Cancellous Screw  | 1731         | --                | --                                                                                                           |
|                                     | Sliding Hip Screw            | 867          | --                | --                                                                                                           |
| Wang, 2021 <sup>32</sup>            | Cannulated Screw             | 60           | --                | Grade I: 18.3% (11/60)<br>Grade II: 81.7% (49/60)                                                            |
| Wani, 2014 <sup>33</sup>            | Cannulated Screw             | 50           | 65.16             | Grade I: 0.0% (0/50)<br>Grade II: 0.0% (0/50)<br>Grade III: 52.0% (26/50)<br>Grade IV: 48.0% (24/50)         |
| Wong, 2022 <sup>34</sup>            | Cannulated Screw             | 233          | 73.04±12.89       | Grade I/II: 83.6% (195/233)<br>Grade III/IV: 16.3% (38/233)                                                  |
| Yu, 2013 <sup>35</sup>              | Cannulated Screw             | 78           | 28 (16-38)        | Grade III: 48.7% (38/78)<br>Grade IV: 51.3% (40/78)                                                          |
| <b><i>Retrospective Studies</i></b> |                              |              |                   |                                                                                                              |
| Biber, 2014 <sup>36</sup>           | Targon FN System             | 135          | 71.1±15.3 (26-95) | Grade I: 32.1% (43/134)<br>Grade II: 34.3% (46/134)<br>Grade III: 23.1% (31/134)<br>Grade IV: 10.4% (14/134) |
| Bigoni, 2020 <sup>37</sup>          | Cancellous Screw             | 244<br>(246) | 80±19 (60-99)     | Grade I: 67.9% (167/246)<br>Grade II: 32.1% (79/246)                                                         |

|                                |                                    |       |              |                                                                                                           |
|--------------------------------|------------------------------------|-------|--------------|-----------------------------------------------------------------------------------------------------------|
|                                |                                    | hips) |              | Grade III: 0.0% (0/246)<br>Grade IV: 0.0% (0/246)                                                         |
| Biz, 2019 <sup>38</sup>        | Cannulated Screw                   | 259   | 81.44 ± 7.48 | Grade I: 74.5% (193/259)<br>Grade II: 25.5% (66/259)<br>Grade III: 0.0% (0/259)<br>Grade IV: 0.0% (0/259) |
| Campefeldt, 2022 <sup>39</sup> | Cannulated Screw                   | 58    | 58           | --                                                                                                        |
| Chang, 2022 <sup>40</sup>      | Dynamic Compression Locking System | 26    | 69.3±11.2    | Grade I: 0.0% (0/26)<br>Grade II: 23.1% (6/26)<br>Grade III: 76.9% (20/26)<br>Grade IV: 0.0% (0/26)       |
|                                | Dynamic or Sliding Hip Screw       | 24    | 68.5±11.9    | Grade I: 0.0% (0/24)<br>Grade II: 25.0% (6/24)<br>Grade III: 75.0% (18/24)<br>Grade IV: 0.0% (0/24)       |
| Chen, 2017 <sup>41</sup>       | Cannulated Compression Screw       | 44    | 56.8±9.3     | Grade I: 0.0% (0/44)<br>Grade II: 45.4% (20/44)<br>Grade III: 36.4% (16/44)<br>Grade IV: 18.2% (8/44)     |
|                                | Dynamic Hip Screw-BLADE            | 42    | 58.3±8.6     | Grade I: 0.0% (0/42)<br>Grade II: 57.1% (24/42)<br>Grade III: 31.0% (13/42)<br>Grade IV: 11.9% (5/42)     |
| Chen, 2020 <sup>42</sup>       | Cannulated Screw                   | 41    | 75.1±2.7     | Grade I: 41.5% (17/41)<br>Grade II: 58.5% (24/41)<br>Grade III: 0.0% (0/41)<br>Grade IV: 0 (0/41)         |
| Cintean, 2021 <sup>43</sup>    | FNS (DePuy Synthes)                | 29    | 79.57        | Grade I: 100% (29/29)<br>Grade II: 0.0% (0/29)<br>Grade III: 0.0% (0/29)<br>Grade IV: 0.0% (0/29)         |
|                                | Hemiarthroplasty                   | 34    | 80.35        | Grade I: 100% (34/34)                                                                                     |



|                              |                              |     |                     |                                                                                                          |
|------------------------------|------------------------------|-----|---------------------|----------------------------------------------------------------------------------------------------------|
|                              |                              |     |                     | Grade II: 0.0% (0/34)<br>Grade III: 0.0% (0/34)<br>Grade IV: 0.0% (0/34)                                 |
| Davidson, 2022 <sup>44</sup> | FNS (DePuy Synthes)          | 102 | 62.9±16.5           | Grade I-II: 73.5% (75/102)<br>Grade III-IV: 26.5% (27/102)                                               |
| Elgeidi, 2017 <sup>45</sup>  | Dynamic or Sliding Hip Screw | 35  | 37 (20–50)          | Grade I: 0.0% (0/35)<br>Grade II: 0.0% (0/35)<br>Grade III: 71.4% (25/35)<br>Grade IV: 28.6% (10/35)     |
| Elmi, 2013 <sup>46</sup>     | Cannulated Screw             | 26  | 34.3±12.5           | Grade I: 61.5% (16/26)<br>Grade II: 38.5% (10/26)<br>Grade III: 0.0% (0/26)<br>Grade IV: 0.0% (0/26)     |
| Enrietti, 2020 <sup>47</sup> | Cannulated Screw             | 91  | 52.5 (25–69)        | Grade I: 35.2% (32/91)<br>Grade II: 12.1% (11/91)<br>Grade III: 20.9% (19/91)<br>Grade IV: 31.9% (29/91) |
| Galal, 2017 <sup>48</sup>    | Cannulated Screw             | 41  | 41.5 (23-49)        | Grade I: 0.0% (0/41)<br>Grade II: 0.0% (0/41)<br>Grade III: 58.5% (24/41)<br>Grade IV: 41.5% (17/41)     |
| Gruszka, 2017 <sup>49</sup>  | Targon FN System             | 62  | 56.6±14.8           | Grade I: 24.2% (15/62)<br>Grade II: 16.1% (10/62)<br>Grade III: 35.5% (22/62)<br>Grade IV: 24.2% (15/62) |
| Gumustas, 2018 <sup>50</sup> | Cannulated Screw             | 31  | 39.51±10.68 (18-60) | Grade I: 12.9% (4/31)<br>Grade II: 25.8% (8/31)<br>Grade III: 19.4% (6/31)<br>Grade IV: 41.9% (13/31)    |
| Han, 2022 <sup>51</sup>      | Cannulated Screw             | 384 | --                  | Grade I/II: 40.6% (156/384)<br>Grade III/IV: 59.4%                                                       |

|                              |                                          |    |              |                                                                                                          |
|------------------------------|------------------------------------------|----|--------------|----------------------------------------------------------------------------------------------------------|
|                              |                                          |    |              | (228/384)                                                                                                |
| He, 2019 <sup>52</sup>       | Cannulated Screw                         | 30 | 56.2 (30-84) | Grade I: 33.3% (10/30)<br>Grade II: 23.3% (7/30)<br>Grade III: 36.7% (11/30)<br>Grade IV: 6.7% (2/30)    |
| He, 2021 <sup>53</sup>       | Cannulated Screw                         | 36 | 47.58±10.31  | Grade I: 5.6% (2/36)<br>Grade II: 25.0% (9/36)<br>Grade III: 55.6% (20/36)<br>Grade IV: 13.9% (5/36)     |
|                              | FNS (DePuy Synthes)                      | 33 | 50.61±10.3   | Grade I: 3.0% (1/33)<br>Grade II: 24.2% (8/33)<br>Grade III: 57.6% (19/33)<br>Grade IV: 15.2% (5/33)     |
| Hiranaka, 2021 <sup>54</sup> | Dynamic or Sliding Hip Screw             | 66 | 73.2         | --                                                                                                       |
| Hu, 2021 <sup>55</sup>       | Cannulated Screw                         | 24 | 50.46±9.26   | Grade I: 16.7% (4/24)<br>Grade II: 25.0% (6/24)<br>Grade III: 29.2% (7/24)<br>Grade IV: 29.2% (7/24)     |
|                              | FNS (DePuy Synthes)                      | 20 | 50.45±8.45   | Grade I: 0.0% (0/20)<br>Grade II: 30.0% (6/20)<br>Grade III: 40.0% (8/20)<br>Grade IV: 30.0% (6/20)      |
| Huang, 2020 <sup>56</sup>    | Cannulated Screw                         | 67 | 48.87±11.77  | Grade I: 28.4% (19/67)<br>Grade II: 26.9% (18/67)<br>Grade III: 20.9% (14/67)<br>Grade IV: 23.9% (16/67) |
| Huang, 2022 <sup>57</sup>    | Multiple Cannulated Screw & Plate System | 48 | 48.73±6.38   | Grade I: 79% (38/48)<br>Grade II: 19% (9/48)<br>Grade III: 2% (1/48)<br>Grade IV: 0.0% (0/48)            |
|                              | Cannulated Screw                         | 54 | 48.46±7.26   | Grade I: 31% (17/54)<br>Grade II: 43% (23/54)                                                            |

|                              |                                |       |                    |                                                                                                          |
|------------------------------|--------------------------------|-------|--------------------|----------------------------------------------------------------------------------------------------------|
|                              |                                |       |                    | Grade III: 24% (13/54)<br>Grade IV: 2% (1/54)                                                            |
| Jettoo, 2016 <sup>58</sup>   | Cancellous Screw               | 34870 | --                 | --                                                                                                       |
|                              | Dynamic or Sliding Hip Screw   | 18014 | --                 | --                                                                                                       |
| Jin, 2022 <sup>59</sup>      | Percutaneous Compression Plate | 51    | 55.96 ± 14.08      | Grade I/II: 49.0% (25/51)<br>Grade III/IV: 51.0% (26/51)                                                 |
| Ju, 2020 <sup>60</sup>       | Cannulated Screw               | 73    | 68.22±7.07 (60-85) | Grade I: 0.0% (0/73)<br>Grade II: 47.9% (35/73)<br>Grade III: 32.9% (24/73)<br>Grade IV: 19.2% (14/73)   |
| Kain, 2014 <sup>61</sup>     | Cannulated Screw               | 120   | 80 (65-100)        | --                                                                                                       |
| Kalsbeek, 2018 <sup>62</sup> | Dynamic or Sliding Hip Screw   | 106   | 52 (23-60)         | --                                                                                                       |
| Kang, 2016 <sup>63</sup>     | Cannulated Screw               | 84    | 55.8 (16-88)       | --                                                                                                       |
| Khoo, 2014 <sup>64</sup>     | Cannulated Screw               | 53    | 42.1 (6-91)        | --                                                                                                       |
| Kilian, 2018 <sup>65</sup>   | Targon FN System               | 82    | 71.6 (30-90)       | Grade I: 20.7% (17/82)<br>Grade II: 30.5% (25/82)<br>Grade III: 20.7% (17/82)<br>Grade IV: 28.0% (23/82) |
| Kim, 2014 <sup>66</sup>      | Cannulated Screw               | 60    | 77.5 (65-96)       | Grade I: 48.3% (28/58)<br>Grade II: 51.7% (30/58)<br>Grade III: 0.0% (0/58)<br>Grade IV: 0.0% (0/58)     |
| Kim, 2015 <sup>67</sup>      | Cannulated Screw               | 52    | 44.3 (24-60)       | Grade I: 11.5% (6/52)<br>Grade II: 25.0% (13/52)<br>Grade III: 57.7% (30/52)<br>Grade IV: 5.8% (3/52)    |
| Kosola, 2017 <sup>68</sup>   | Cannulated Screw               | 12    | 54 (29-74)         | --                                                                                                       |
|                              | Dynamic or Sliding Hip Screw   | 24    | 61 (46-79)         | --                                                                                                       |
| Lin, 2022 <sup>69</sup>      | Multiple Cannulated            | 27    | 34.7               | Grade I: 0.0% (0/27)                                                                                     |

|                                 |                              |     |             |                                                                                                          |
|---------------------------------|------------------------------|-----|-------------|----------------------------------------------------------------------------------------------------------|
|                                 | Screw & Plate System         |     |             | Grade II: 0.0% (0/27)<br>Grade III: 66.7% (18/27)<br>Grade IV: 33.3% (9/27)                              |
| Ma, 2022 <sup>70</sup>          | Cannulated Screw             | 47  | 40.28±12.64 | Grade I: 0.0% (0/47)<br>Grade II: 0.0% (0/47)<br>Grade III: 59.6% (28/47)<br>Grade IV: 40.4% (19/47)     |
| Makki, 2013 <sup>71</sup>       | Dynamic or Sliding Hip Screw | 31  | 75 (46-92)  | --                                                                                                       |
| Manohara, 2014 <sup>72</sup>    | Cancellous Screw             | 100 | 78 (61-94)  | Grade I: 85.0% (85/100)<br>Grade II: 15.0% (15/100)<br>Grade III: 0.0% (0/100)<br>Grade IV: 0.0% (0/100) |
| Mubark, 2021 <sup>73</sup>      | Cannulated Screw             | 56  | 39.1        | --                                                                                                       |
| Mue, 2013 <sup>74</sup>         | Dynamic or Sliding Hip Screw | 43  | 65±15       | --                                                                                                       |
| Mukka, 2020 <sup>75</sup>       | Cannulated Screw             | 65  | 83 (61-98)  | --                                                                                                       |
| Nibe, 2021 <sup>76</sup>        | Cannulated Screw             | 27  | 77.8±7.3    | --                                                                                                       |
|                                 | FNS (DePuy Synthes)          | 25  | 81.2±7.9    | --                                                                                                       |
| Niemann, 2022 <sup>77</sup>     | Dynamic or Sliding Hip Screw | 19  | 60.47±17    | Grade I: 10.5% (2/19)<br>Grade II: 47.4% (9/19)<br>Grade III: 21.2% (4/19)<br>Grade IV: 21.1% (4/19)     |
|                                 | FNS (DePuy Synthes)          | 12  | 66.5±10.98  | Grade I: 8.3% (1/12)<br>Grade II: 66.7% (8/12)<br>Grade III: 16.7% (2/12)<br>Grade IV: 8.3% (1/12)       |
| Osarumwense, 2015 <sup>78</sup> | Targon FN System             | 51  | 66 (24-94)  | --                                                                                                       |
| Parker, 2013 <sup>79</sup>      | Targon FN System             | 320 | --          | --                                                                                                       |
| Patterson, 2020 <sup>80</sup>   | Cannulated Screw             | 234 | 44.55       | --                                                                                                       |
| Qiu, 2022 <sup>81</sup>         | Cannulated Screw             | 190 | 49.96±12.02 | Grade II: 16.3% (31/190)<br>Grade III: 31.6% (60/190)                                                    |

|                                  |                              |      |                   |                                                                                                             |
|----------------------------------|------------------------------|------|-------------------|-------------------------------------------------------------------------------------------------------------|
|                                  |                              |      |                   | Grade IV: 52.1% (99/190)                                                                                    |
| Riaz, 2016 <sup>82</sup>         | Cannulated Screw             | 251  | 77 (60-101)       | Grade I: 57.8% (145/251)<br>Grade II: 42.2% (106/251)<br>Grade III: 0.0% (0/251)<br>Grade IV: 0.0% (0/251)  |
| Schuetze, 2022 <sup>83</sup>     | Dynamic or Sliding hip screw | 108  | 68.5±15.1         | Grade I: 20.4% (22/108)<br>Grade II: 45.4% (49/108)<br>Grade III: 26.9% (29/108)<br>Grade IV: 7.4% (8/108)  |
|                                  | FNS (DePuy Synthes)          | 113  | 70.6±14.9         | Grade I: 14.2% (16/113)<br>Grade II: 49.6% (56/113)<br>Grade III: 26.5% (30/113)<br>Grade IV: 9.7% (11/113) |
| Schwartzmann, 2018 <sup>84</sup> | Dynamic or Sliding Hip Screw | 53   | 41.9±12.8 (18-55) | Grade I: 0.0% (0/53)<br>Grade II: 0.0% (0/53)<br>Grade III: 39.6% (21/53)<br>Grade IV: 60.4% (32/53)        |
| Shields, 2014 <sup>85</sup>      | Cannulated Screw             | 119  | 85.1±7.7          | --                                                                                                          |
| Sjöholm, 2021 <sup>86</sup>      | Cannulated Screw             | 1505 | 81±9 (60-108)     | --                                                                                                          |
| Stassen, 2021 <sup>87</sup>      | FNS (DePuy Synthes)          | 34   | 63±8              | Grade I: 2.9% (1/34)<br>Grade II: 50.0% (17/34)<br>Grade III: 35.3% (12/34)<br>Grade IV: 11.8% (4/34)       |
| Sundkvist, 2022 <sup>88</sup>    | Cannulated Screw             | 93   | 82                | --                                                                                                          |
| Takigawa, 2016 <sup>89</sup>     | Targon FN System             | 84   | 74 (36-100)       | --                                                                                                          |
| Tang, 2021 <sup>90</sup>         | Cannulated Screw             | 45   | 54.8±11.7         | Grade I: 0.0% (0/45)<br>Grade II: 11.1% (5/45)<br>Grade III: 68.9% (31/45)<br>Grade IV: 20.0% (9/45)        |
|                                  | FNS (DePuy Synthes)          | 47   | 57.4±15           | Grade I: 0.0% (0/47)<br>Grade II: 12.8% (6/47)<br>Grade III: 61.7% (29/47)<br>Grade IV: 25.5% (12/47)       |

|                             |                                          |     |                            |                                                                                                             |
|-----------------------------|------------------------------------------|-----|----------------------------|-------------------------------------------------------------------------------------------------------------|
| Vazquez, 2021 <sup>91</sup> | Cannulated Screw                         | 32  | 85±6.6 (79.8-90)           | --                                                                                                          |
|                             | Dynamic or Sliding hip Screw             | 16  | 83.4±7.3<br>81 (77.8-88.8) | --                                                                                                          |
|                             | FNS (DePuy Synthes)                      | 15  | 86.1±4.6<br>87 (85-88.5)   | --                                                                                                          |
| Wan, 2021 <sup>92</sup>     | Cannulated Screw                         | 21  | 51.33±4.3 (29-67)          | Grade I: 0.0% (0/21)<br>Grade II: 19.0% (4/21)<br>Grade III: 57.1% (12/21)<br>Grade IV: 23.8% (5/21)        |
| Wang, 2014 <sup>93</sup>    | Cannulated Screw                         | 146 | 47.5 (18-68)               | Grade I: 6.8% (10/146)<br>Grade II: 31.5% (46/146)<br>Grade III: 42.5% (62/146)<br>Grade IV: 19.2% (28/146) |
| Wang, 2015 <sup>94</sup>    | Cannulated Screw                         | 209 | 47.08±9.93                 | --                                                                                                          |
| Wang, 2018 <sup>95</sup>    | Cancellous Screw                         | 34  | 46.02±6.23                 | Grade I: 0.0% (0/34)<br>Grade II: 0.0% (0/34)<br>Grade III: 61.8% (21/34)<br>Grade IV: 38.2% (13/34)        |
|                             | Multiple Cancellous Screw & Plate System | 34  | 45.12±5.38                 | Grade I: 0.0% (0/34)<br>Grade II: 0.0% (0/34)<br>Grade III: 67.6% (23/34)<br>Grade IV: 32.4% (11/34)        |
| Wang, 2019 <sup>96</sup>    | Cannulated Screw                         | 65  | 49.8±7.68                  | Grade I: 21.5% (14/65)<br>Grade II: 55.4% (36/65)<br>Grade III: 15.4% (10/65)<br>Grade IV: 7.7% (5/65)      |
| Wang, 2022 <sup>97</sup>    | Cannulated Screw                         | 153 | 10.6±3.7                   | --                                                                                                          |
| Wenbo, 2014a <sup>98</sup>  | Dynamic Hip System Blade                 | 60  | 66.8±3.2                   | Grade II: 11.7% (7/60)<br>Grade III: 76.7% (46/60)<br>Grade IV: 11.7% (7/60)                                |
| Wenbo, 2014b <sup>99</sup>  | Dynamic or Sliding Hip Screw             | 42  | 68.5 (60-75)               | Grade II: 45.2% (19/42)<br>Grade III: 50.0% (21/42)<br>Grade IV: 4.8% (2/42)                                |

|                                |                                               |     |                   |                                                                                                           |
|--------------------------------|-----------------------------------------------|-----|-------------------|-----------------------------------------------------------------------------------------------------------|
| Xiao, 2018 <sup>100</sup>      | Dynamic or Sliding Hip Screw                  | 36  | 65.33±9.3 (53-82) | Grade I: 0.0% (0/36)<br>Grade II: 25.0% (9/36)<br>Grade III: 75% (27/36)<br>Grade IV: 0.0% (0/36)         |
| Xu, 2022a <sup>101</sup>       | Cancellous Screw                              | 51  | 61.6±16.4         | Grade I+II: 70.6% (36/51)<br>Grade III+IV: 29.4% (15/51)                                                  |
|                                | Dynamic or Sliding Hip Screw                  | 52  | 63.1±13.2         | Grade I+II: 82.7% (43/52)<br>Grade III+IV: 17.3% (9/52)                                                   |
|                                | FNS (DePuy Synthes)                           | 54  | 60.7±15.2         | Grade I+II: 64.8% (35/54)<br>Grade III+IV: 35.2% (19/54)                                                  |
| Xu, 2022b <sup>102</sup>       | Sliding Fixation (Three Cannulated Screws)    | 60  | 60.9±16.8         | Grade I+II: 73.3% (44/60)<br>Grade III+IV: 26.7% (16/60)                                                  |
|                                | Non-sliding Fixation (Four Cannulated Screws) | 42  | 60.9±18.4         | Grade I+II: 47.6% (20/42)<br>Grade III+IV: 52.4% (22/42)                                                  |
| Yang, 2022 <sup>103</sup>      | Parallel Cannulated Screws                    | 10  | 67 (61-70)        | Grade II: 40.0% (4/10)<br>Grade III: 60.0% (6/10)                                                         |
| Ye, 2017 <sup>104</sup>        | Cannulated Screw                              | 28  | 42.1 (29-57)      | --                                                                                                        |
| Yoon, 2021 <sup>105</sup>      | Multiple Cannulated Screws                    | 6   | --                | --                                                                                                        |
|                                | Dynamic or Sliding Hip Screw                  | 2   | --                | --                                                                                                        |
| Yoshikawa, 2022 <sup>106</sup> | Sliding Hip Screw (TresLock)                  | 10  | 83.9±5.9          | --                                                                                                        |
| Yuan, 2022 <sup>107</sup>      | Cannulated Screw                              | 113 | 48.4±13.4         | --                                                                                                        |
| Zhang, 2022 <sup>108</sup>     | Cannulated Screw                              | 36  | 52.5±10.72        | Grade I: 0.0% (0/36)<br>Grade II: 33.33% (12/36)<br>Grade III: 38.89% (14/36)<br>Grade IV: 27.78% (10/36) |

|                             |                              |     |                  |                                                                                                              |
|-----------------------------|------------------------------|-----|------------------|--------------------------------------------------------------------------------------------------------------|
|                             | FNS (DePuy Synthes)          | 33  | 57.61±11.87      | Grade I: 0.0% (0/33)<br>Grade II: 30.30% (10/33)<br>Grade III: 27.27% (9/33)<br>Grade IV: 42.42% (14/33)     |
| Zhao, 2014a <sup>109</sup>  | Dynamic or Sliding Hip Screw | 42  | 68.5 (60-75)     | Grade I: 0.0% (0/42)<br>Grade II: 45.2% (19/42)<br>Grade III: 50.0% (21/42)<br>Grade IV: 4.8% (2/42)         |
| Zhao, 2014b <sup>110</sup>  | Dynamic or Sliding Hip Screw | 60  | 66.8±3.2         | Grade I: 0.0% (0/60)<br>Grade II: 11.7% (7/60)<br>Grade III: 76.7% (46/60)<br>Grade IV: 11.7% (7/60)         |
| Zhao, 2021 <sup>111</sup>   | Cancellous Screw             | 122 | 40.79±19.63      | Grade I: 20.5% (25/122)<br>Grade II: 11.5% (14/122)<br>Grade III: 36.9% (45/122)<br>Grade IV: 31.1% (38/122) |
| Zhou, 2021 <sup>112</sup>   | Cannulated Screw             | 51  | 53.14±7.19       | --                                                                                                           |
|                             | FNS (DePuy Synthes)          | 30  | 54.53±6.71       | --                                                                                                           |
| Zhu, 2021 <sup>113</sup>    | Cannulated Screw             | 83  | 47.7±12.6        | Grade I: 19.3% (16/83)<br>Grade II: 12.0% (10/83)<br>Grade III: 39.8% (33/83)<br>Grade IV: 28.9% (24/83)     |
| Zhu, 2022a <sup>114</sup>   | Dynamic or Sliding Hip Screw | 68  | 49.67±11.20      | Grade I: 0.0% (0/68)<br>Grade II: 0.0% (0/68)<br>Grade III: 76.5% (52/68)<br>Grade IV: 23.5% (16/68)         |
| Zhu, 2022b <sup>115</sup>   | Cannulated Screw             | 91  | 72.37±7.16       | Grade I: 17.6% (16/91)<br>Grade II: 82.4% (75/91)<br>Grade III: 0.0% (0/91)<br>Grade IV: 0.0% (0/91)         |
| Zhuang, 2019 <sup>116</sup> | Cannulated Screw             | 26  | 36.5±6.5 (19-44) | Grade I: 0.0% (0/26)<br>Grade II: 0.0% (0/26)<br>Grade III: 46.2% (12/26)                                    |



|                              |                              |    |            |                         |
|------------------------------|------------------------------|----|------------|-------------------------|
|                              |                              |    |            | Grade IV: 53.8% (14/26) |
| <i>Case Series</i>           |                              |    |            |                         |
| Faisham, 2021 <sup>117</sup> | Dynamic or Sliding Hip Screw | 10 | 22 (15-37) | --                      |

Data are expressed as mean±SD, median (IQR), or % (n/N) unless otherwise indicated. "--" indicates no data reported.

\*Garden classification: Grade I, incomplete or valgus impacted fracture; Grade II, complete fracture without bone displacement; Grade III, complete fracture with partial displacement of the fracture fragments; Grade IV, complete fracture with total displacement of the fracture fragments.

FN, femoral neck; FNS, femoral neck system; DePuy Synthes, Johnson & Johnson.

**Supplemental Table 5.** Procedure characteristics

| <b>Study</b>                     | <b>Intervention</b>          | <b>N</b> | <b>Length of Operation (minutes)</b> | <b>Intraoperative Blood Loss (mL)</b> | <b>Length of Hospital Stay (days)</b> |
|----------------------------------|------------------------------|----------|--------------------------------------|---------------------------------------|---------------------------------------|
| <i>Randomized Control Trials</i> |                              |          |                                      |                                       |                                       |
| Bartels, 2022 <sup>1</sup>       | Cannulated Screw             | 51       | 43.3 ± 28.5                          | 119.6 ± 144.4                         | --                                    |
|                                  | Total Hip Arthroplasty       | 51       | 107.4 ± 22.9                         | 418.8 ± 208.1                         | --                                    |
| Chammout, 2012 <sup>2</sup>      | Cannulated Screw             | 57       | --                                   | --                                    | --                                    |
| FAITH <sup>3</sup>               | Cancellous Screw             | 551      | --                                   | --                                    | --                                    |
|                                  | Dynamic or Sliding Hip Screw | 557      | --                                   | --                                    | --                                    |
| Griffin, 2014 <sup>4</sup>       | Cannulated Screw             | 123      | --                                   | --                                    | 22±--                                 |
|                                  | Targon FN System             | 51       | --                                   | --                                    | 18±--                                 |
| Kumar, 2015 <sup>5</sup>         | Cancellous Screw             | 87       | --                                   | --                                    | --                                    |
| Rahman, 2022 <sup>6</sup>        | Cancellous Screw             | 11       | --                                   | --                                    | --                                    |
|                                  | Cannulated Screw             | 11       | --                                   | --                                    | --                                    |
| Siavashi, 2015 <sup>7</sup>      | Cannulated Screw             | 28       | --                                   | --                                    | --                                    |
|                                  | Dynamic or Sliding Hip Screw | 30       | --                                   | --                                    | --                                    |
| Watson, 2013 <sup>8</sup>        | Cannulated Screw             | 29       | --                                   | --                                    | --                                    |
|                                  | Dynamic or Sliding Hip Screw | 31       | --                                   | --                                    | --                                    |

|                                          |                                                 |      |             |              |            |
|------------------------------------------|-------------------------------------------------|------|-------------|--------------|------------|
| Wei, 2020 <sup>9</sup>                   | Cannulated Screw                                | 51   | 23.1±12.2   | 32.2±13.1    | 8.8±8.5    |
| Yin, 2016 <sup>10</sup>                  | Cannulated Screw                                | 64   | --          | --           | --         |
| Zhang, 2022 <sup>108</sup>               | Multiple Cannulated Screw & Plate System        | 36   | 53.05±12.77 | 36.66±9.56   | --         |
|                                          | Cannulated Screw                                | 41   | 47.78±10.04 | 13.29±7.12   | --         |
| Zhao, 2022 <sup>12</sup>                 | Cannulated Screw                                | 21   | 63.38±5.17  | 140.50±31.38 | 11.95±1.72 |
|                                          | Bidirectional Pressurized Porous Tantalum Screw | 20   | 64.40±4.29  | 147.30±32.63 | 12.25±1.37 |
| <b><i>Comparative Study</i></b>          |                                                 |      |             |              |            |
| Borris, 2018 <sup>13</sup>               | Dynaloc                                         | 22   | --          | --           | --         |
|                                          | Cancellous Screw                                | 18   | --          | --           | --         |
| Eschler, 2014 <sup>14</sup>              | Dynamic or Sliding Hip Screw                    | 25   | 55.5±23.2   | --           | 9.8±2.9    |
|                                          | Targon FN system                                | 27   | 56±17.4     | --           | 13.6±4.9   |
| <b><i>Cross-sectional Study</i></b>      |                                                 |      |             |              |            |
| Ahmed, 2022 <sup>15</sup>                | Cannulated Screw                                | 35   | 71.43±7.92  | --           | --         |
| <b><i>Prospective Cohort Studies</i></b> |                                                 |      |             |              |            |
| Alshameeri, 2017 <sup>16</sup>           | Cannulated Screw                                | 1279 | 33.7±--     | --           | 15.5±--    |
|                                          | Targon FN System                                | 725  | 47.1±--     | --           | 13.3±--    |
| Beder, 2021 <sup>17</sup>                | Dynamic or Sliding Hip Screw                    | 20   | --          | --           | --         |
| Bisaccia, 2018 <sup>18</sup>             | Cannulated Screw                                | 75   | 33±--       | 156±--       | --         |
|                                          | Dynamic or Sliding Hip Screw                    | 42   | 67±--       | 210±--       | --         |

|                                  |                              |      |           |           |         |
|----------------------------------|------------------------------|------|-----------|-----------|---------|
| Dong, 2019 <sup>19</sup>         | Cancellous Screw             | 30   | 46.2±20.9 | 68.6±25.3 | 7.1±2.3 |
|                                  | Cannulated Screw             | 30   | 40.9±18.3 | 62.4±32.5 | 7.3±1.4 |
| Duan, 2019 <sup>20</sup>         | Cannulated Screw             | 23   | 79±9.8    | 41.3±12.4 | --      |
| Guimarães, 2017 <sup>21</sup>    | Cancellous Screw             | 20   | --        | --        | --      |
| Gupta, 2016 <sup>22</sup>        | Cannulated Screw             | 45   | 61.6±--   | 67.4±--   | --      |
|                                  | Dynamic or Sliding Hip Screw | 40   | 111±--    | 200±--    | --      |
| Imobi Singh, 2021 <sup>23</sup>  | Cannulated Screw             | 47   | 92±15.62  | --        | 10±2    |
| Lin, 2012 <sup>24</sup>          | Cannulated Screw             | 41   | 63.6±--   | 84.2±--   | --      |
| Nyholm, 2018 <sup>25</sup>       | Parallel Screws              | 1206 | --        | --        | --      |
| Qiu, 2016 <sup>26</sup>          | Thread Needles               | 32   | 421.3±2.7 | 453.6±2.7 | --      |
|                                  | Cancellous Screw             | 32   | 328.5±1.4 | 236.7±2.0 | --      |
| Ramadanov, 2020 <sup>27</sup>    | Cannulated Screw             | 56   | --        | --        | --      |
| Sami, 2022 <sup>28</sup>         | Cannulated Screws            | 27   | --        | --        | --      |
| Schwartzmann, 2014 <sup>29</sup> | Dynamic or Sliding Hip Screw | 96   | --        | --        | 9±--    |
| Shu, 2020 <sup>30</sup>          | Cannulated Screw             | 26   | 59±11.4   | 56.2±9.2  | --      |
|                                  | Dynamic or Sliding hip Screw | 28   | 58.7±9.0  | 56.8±9.5  | --      |
| Viberg, 2022 <sup>31</sup>       | Cannulated Cancellous Screw  | 1731 | --        | --        | --      |
|                                  | Sliding Hip Screw            | 867  | --        | --        | --      |
| Wang, 2021 <sup>32</sup>         | Cannulated Screw             | 60   | --        | --        | --      |

|                                     |                                    |     |           |           |          |
|-------------------------------------|------------------------------------|-----|-----------|-----------|----------|
| Wani, 2014 <sup>33</sup>            | Cannulated Screw                   | 50  | 45±--     | 700±--    | 4.8±--   |
| Wong, 2022 <sup>34</sup>            | Cannulated Screw                   | 233 | 41.1±11.2 | --        | 9.1±5.7  |
| Yu, 2013 <sup>35</sup>              | Cannulated Screw                   | 78  | --        | --        | --       |
| <b><i>Retrospective Studies</i></b> |                                    |     |           |           |          |
| Biber, 2014 <sup>36</sup>           | Targon FN system                   | 135 | 60.4±--   | --        | 10±--    |
| Bigoni, 2020 <sup>37</sup>          | Cancellous Screw                   | 244 | --        | --        | --       |
| Biz, 2019 <sup>38</sup>             | Cannulated Screw                   | 259 | --        | --        | --       |
| Campenfeldt, 2022 <sup>39</sup>     | Cannulated Screw                   | 58  | 58        | --        |          |
| Chang, 2022 <sup>40</sup>           | Dynamic Compression Locking System | 26  | 59.7±9.2  | 51.1±7.4  | 15.3±4.2 |
|                                     | Dynamic or Sliding Hip Screw       | 24  | 78.3±10.1 | 66.4±18.0 | 15.0±4.2 |
| Chen, 2017 <sup>41</sup>            | Dynamic Compression Locking System | 44  | 47.2±18.6 | 32.4±24.7 | 5.6±2.8  |
|                                     | Dynamic Hip Screw                  | 42  | 43.4±20.3 | 87.2±46.6 | 6.1±2.2  |
| Chen, 2020 <sup>42</sup>            | Cannulated Screw                   | 41  | 31.6±6.9  | 40.5±15.7 | 9.3±1.1  |
| Cintean, 2021 <sup>43</sup>         | FNS (DePuy Synthes)                | 29  | --        | --        | 9.8±3.8  |
|                                     | Hemiarthroplasty                   | 34  | --        | --        | 15.1±5.1 |
| Davidson, 2022 <sup>44</sup>        | FNS (DePuy Synthes)                | 102 | 44±14     | 51±47     | 5.7±3.9  |
| Elgeidi, 2017 <sup>45</sup>         | Dynamic or Sliding Hip Screw       | 35  | 90–120    | --        | --       |
| Elmi, 2013 <sup>46</sup>            | Cannulated Screw                   | 26  | --        | --        | --       |
| Enrietti, 2020 <sup>47</sup>        | Cannulated Screw                   | 91  | --        | --        | --       |

|                              |                                          |       |             |              |           |
|------------------------------|------------------------------------------|-------|-------------|--------------|-----------|
| Galal, 2017 <sup>48</sup>    | Cannulated Screw                         | 41    | 45±--       | --           | --        |
| Gruszka, 2017 <sup>49</sup>  | Targon FN System                         | 62    | 96±--       | --           | 9.2±4.8   |
| Gumustas, 2018 <sup>50</sup> | Cannulated Screw                         | 31    | --          | --           | --        |
| Han, 2022 <sup>51</sup>      | Cannulated Screw                         | 384   | 48.27±--    | 88.8±--      | 5.67±--   |
| He, 2019 <sup>52</sup>       | Cannulated Screw                         | 30    | 38±--       | --           | --        |
| He, 2021 <sup>53</sup>       | Cannulated Screw                         | 36    | 56.1±12.5   | --           | 4.8±1.6   |
|                              | FNS (DePuy Synthes)                      | 33    | 49.9±14.5   | --           | 5.1±1.9   |
| Hiranaka, 2021 <sup>54</sup> | Dynamic or Sliding Hip Screw             | 66    | --          | --           | --        |
| Hu, 2021 <sup>55</sup>       | Cannulated Screw                         | 24    | 64.6±18.6   | 23.7±28.1    | --        |
|                              | FNS (DePuy Synthes)                      | 20    | 79.8±26.4   | 69.5±50.5    | --        |
| Huang, 2020 <sup>56</sup>    | Cannulated Screw                         | 67    | 38.3±--     | --           | --        |
| Huang, 2022 <sup>57</sup>    | Multiple Cannulated Screw & Plate System | 48    | 75.35±27.67 | 153.45±64.27 | 6.23±2.38 |
|                              | Cannulated Screw                         | 54    | 36.87±15.39 | 21.86±18.19  | 5.16±1.45 |
| Jattoo, 2016 <sup>58</sup>   | Cancellous Screw                         | 34870 | --          | --           | 15±19     |
|                              | Dynamic or Sliding Hip Screw             | 18014 | --          | --           | 13±18     |
| Jin, 2022 <sup>59</sup>      | Percutaneous Compression Plate           | 51    | 109.6±62.6  | --           | 13.1±4.0  |
| Ju, 2020 <sup>60</sup>       | Cannulated Screw                         | 73    | 60±10.2     | 15±--        | --        |

|                              |                                          |     |              |             |         |
|------------------------------|------------------------------------------|-----|--------------|-------------|---------|
| Kain, 2014 <sup>61</sup>     | Cannulated SScrew                        | 120 | --           | --          | --      |
| Kalsbeek, 2018 <sup>62</sup> | Dynamic or Sliding Hip Screw             | 106 | 44±--        | --          | --      |
| Kang, 2016 <sup>63</sup>     | Cannulated Screw                         | 84  | --           | --          | --      |
| Khoo, 2014 <sup>64</sup>     | Cannulated Screw                         | 53  | --           | --          | --      |
| Kilian, 2018 <sup>65</sup>   | Targon FN System                         | 82  | 55.8±16.8    | --          | --      |
| Kim, 2014 <sup>66</sup>      | Cannulated Screw                         | 60  | 46±--        | --          | 14.7±-- |
| Kim, 2015 <sup>67</sup>      | Cannulated Screw                         | 52  | --           | --          | --      |
| Kosola, 2017 <sup>68</sup>   | Cannulated Screw                         | 12  | --           | --          | --      |
|                              | Dynamic or Sliding hip Screw             | 24  | --           | --          | --      |
| Lin, 2022 <sup>69</sup>      | Multiple Cannulated Screw & Plate System | 27  | 89.4         | 134.4       | --      |
| Ma, 2022 <sup>70</sup>       | Cannulated Screw                         | 47  | 52.17± 11.57 | 51.81±19.21 | --      |
| Makki, 2013 <sup>71</sup>    | Dynamic or Sliding Hip Screw             | 31  | 44.5         | --          | --      |
| Manohara, 2014 <sup>72</sup> | Cancellous Screw                         | 100 | 53±--        | --          | 12±--   |
| Mubark, 2021 <sup>73</sup>   | Cannulated Screw                         | 56  | 54±--        | 98.1±--     | --      |
| Mue, 2013 <sup>74</sup>      | Dynamic or Sliding Hip Screw             | 43  | 109±29       | 341±122     | 15±4    |
| Mukka, 2020 <sup>75</sup>    | Cannulated Screw                         | 65  | --           | --          | --      |
| Nibe, 2021 <sup>76</sup>     | Cannulated Screw                         | 27  | 53±21        | 41±40       | --      |

|                                  |                              |      |                              |                              |           |
|----------------------------------|------------------------------|------|------------------------------|------------------------------|-----------|
|                                  | FNS (DePuy Synthes)          | 25   | 42±13                        | 36±25                        | --        |
| Niemann, 2022 <sup>77</sup>      | Dynamic or Sliding Hip Screw | 19   | 91.68±23.96                  | --                           | 7.35±3.43 |
|                                  | FNS (DePuy Synthes)          | 12   | 54±26.1                      | --                           | 8±5.27    |
| Osarumwense, 2015 <sup>78</sup>  | Targon FN System             | 51   | 67±--                        | --                           | --        |
| Parker, 2013 <sup>79</sup>       | Targon FN System             | 320  | 48±--                        | --                           | 13±--     |
| Patterson, 2020 <sup>80</sup>    | Cannulated Screw             | 234  | --                           | --                           | --        |
| Qiu, 2022 <sup>81</sup>          | Cannulated Screw             | 190  | --                           | --                           | --        |
| Riaz, 2016 <sup>82</sup>         | Cannulated Screw             | 251  | --                           | --                           | --        |
| Schuetze, 2022 <sup>83</sup>     | Dynamic or Sliding hip screw | 108  | 54.7±17.4                    | --                           | 11.3±6.8  |
|                                  | FNS (DePuy Synthes)          | 113  | 36.3±11.6                    | --                           | 8.9±4.3   |
| Schwartzmann, 2018 <sup>84</sup> | Dynamic or Sliding Hip Screw | 53   | --                           | --                           | --        |
| Shields, 2014 <sup>85</sup>      | Cannulated Screw             | 119  | --                           | --                           | 3.8±3.2   |
| Sjöholm, 2021 <sup>86</sup>      | Cannulated Screw             | 1505 | --                           | --                           | --        |
| Stassen, 2021 <sup>87</sup>      | FNS (DePuy Synthes)          | 34   | Mean: 33 (95% CI: 29.3-36.9) | Mean: 34 (95% CI: 24.7-44.6) | 4±2.8     |
| Sundkvist, 2022 <sup>88</sup>    | Cannulated Screw             | 93   | --                           | --                           | --        |
| Takigawa, 2016 <sup>89</sup>     | Targon FN System             | 84   | 44.6±--                      | --                           | --        |
| Tang, 2021 <sup>90</sup>         | Cannulated Screw             | 45   | 42±11.9                      | 47.3±9.3                     | 4.8±1.4   |



|                             |                                          |     |               |            |             |
|-----------------------------|------------------------------------------|-----|---------------|------------|-------------|
|                             | FNS(DePuy Synthes)                       | 47  | 52.4±11.0     | 50.6±10.6  | 5.5±1.3     |
| Vazquez, 2021 <sup>91</sup> | Cannulated Screw                         | 32  | 66.9±25.4     | --         | 12.2±6.2    |
|                             | Dynamic or Sliding Hip Screw             | 16  | 70.7±20.0     | --         | 12.4±5.3    |
|                             | FNS (DePuy Synthes)                      | 15  | 43.3±10.1     | --         | 10.3±6.0    |
| Wan, 2021 <sup>92</sup>     | Cannulated Screw                         | 21  | 88.3±14.3     | 76.9±8.3   | --          |
| Wang, 2014 <sup>93</sup>    | Cannulated Screw                         | 146 | --            | --         | --          |
| Wang, 2015 <sup>94</sup>    | Cannulated Screw                         | 209 | --            | --         | --          |
| Wang, 2018 <sup>95</sup>    | Cancellous Screw                         | 34  | --            | --         | --          |
|                             | Multiple Cancellous Screw & Plate System | 34  | --            | --         | --          |
| Wang, 2019 <sup>96</sup>    | Cannulated Screw                         | 65  | 73.7±9.8      | 25.5±7.0   | --          |
| Wang, 2022 <sup>97</sup>    | Cannulated Screw                         | 153 | --            | --         | --          |
| Wenbo, 2014a <sup>98</sup>  | Dynamic Hip System Blade                 | 60  | --            | --         | --          |
| Wenbo, 2014b <sup>99</sup>  | Dynamic or Sliding Hip Screw             | 42  | 55 (50-70)    | 60 (55-80) | 11.2 (7-21) |
| Xiao, 2018 <sup>100</sup>   | Dynamic or Sliding Hip Screw             | 36  | 50.3±11.8     | 61.7±12.3  | 15.3±3.7    |
| Xu, 2022a <sup>101</sup>    | Cancellous Screw                         | 51  | 49 (38-61)    | 30 (20-45) | 3 (2-4)     |
|                             | Dynamic or Sliding Hip Screw             | 52  | 72 (55-88.75) | 50 (30-50) | 3.5 (3-6)   |

|                                |                                               |     |                |              |           |
|--------------------------------|-----------------------------------------------|-----|----------------|--------------|-----------|
|                                | FNS (DePuy Synthes)                           | 54  | 45 (40-59)     | 30 (20-50)   | 2 (2-4)   |
| Xu, 2022b <sup>102</sup>       | Sliding Fixation (Three Cannulated Screws)    | 60  | 46 (33-61)     | 27.5 (20-30) | 3 (2-4)   |
|                                | Non-sliding Fixation (Four Cannulated Screws) | 42  | 43 (38.8-60.8) | 30 (20-30)   | 2 (2-3.3) |
| Yang, 2022 <sup>103</sup>      | Parallel Cannulated Screws                    | 10  | 32 (25-51)     | --           | --        |
| Ye, 2017 <sup>104</sup>        | Cannulated Screw                              | 28  | 71.4±--        | 270±--       | --        |
| Yoon, 2021 <sup>105</sup>      | Multiple Cannulated Screws                    | 6   | --             | --           | --        |
|                                | Dynamic or Sliding Hip Screw                  | 2   | --             | --           | --        |
| Yoshikawa, 2022 <sup>106</sup> | Sliding Hip Screw (TresLock)                  | 10  | --             | --           | --        |
| Yuan, 2022 <sup>107</sup>      | Cannulated Screw                              | 113 | --             | --           | --        |
| Zhang, 2022 <sup>108</sup>     | Cannulated Screw                              | 36  | 76.81±13.1     | --           | 8.5±1.95  |
|                                | FNS (DePuy Synthes)                           | 33  | 60.00±12.44    | --           | 7.57±2.39 |
| Zhao, 2014a <sup>109</sup>     | Dynamic or Sliding Hip Screw                  | 42  | 55±--          | 60±--        | 11.2±--   |
| Zhao, 2014b <sup>110</sup>     | Dynamic or Sliding Hip Screw                  | 60  | --             | --           | --        |
| Zhao, 2021 <sup>111</sup>      | Cancellous Screw                              | 122 | --             | --           |           |
| Zhou, 2021 <sup>112</sup>      | Cannulated Screw                              | 51  | 40.9±5.2       | 30.3±9.0     | 5.3±1.5   |
|                                | FNS (DePuy Synthes)                           | 30  | 42.8±4.7       | 99.7±4.7     | 5.1±1.3   |

|                              |                              |    |              |             |            |
|------------------------------|------------------------------|----|--------------|-------------|------------|
| Zhu, 2021 <sup>113</sup>     | Cannulated Screw             | 83 | 44.1±14.8    | 51.6±40.4   | 11.1±3.4   |
| Zhu, 2022a <sup>114</sup>    | Dynamic or Sliding Hip Screw | 68 | 131.25±32.72 | --          | --         |
| Zhu, 2022b <sup>115</sup>    | Cannulated Screw             | 91 | 83.85±27.24  | 68.68±28.18 | 10.53±5.02 |
| Zhuang, 2019 <sup>116</sup>  | Cannulated Screw             | 26 | 100±20.5     | 205±45.8    | --         |
| <i>Case Series</i>           |                              |    |              |             |            |
| Faisham, 2021 <sup>117</sup> | Dynamic or Sliding Hip Screw | 10 | --           | --          | --         |

Data are expressed as mean±SD unless otherwise noted.

AVN, avascular necrosis of the femoral head; DVT, deep vein thrombosis; FN, femoral neck; FNS, femoral neck system; DePuy Synthes, Johnson & Johnson.

**Supplemental Table 6.** Patient outcomes

| Study                            | Intervention                 | N   | Perioperative Complications | Postoperative Complications                                                               | Non-union     | Internal Fixture Loosening | Reoperation     | Mortality      |
|----------------------------------|------------------------------|-----|-----------------------------|-------------------------------------------------------------------------------------------|---------------|----------------------------|-----------------|----------------|
| <i>Randomized Control Trials</i> |                              |     |                             |                                                                                           |               |                            |                 |                |
| Bartels, 2022 <sup>1</sup>       | Cannulated Screw             | 51  | --                          | DVT: 2.0% (1/51)                                                                          | --            | 31.4% (16/51)              | 66.7% (34/51)   | --             |
|                                  | Total Hip Arthroplasty       | 51  | --                          | DVT: 0% (0/51)                                                                            | --            | --                         | 3.9% (2/51)     | --             |
| Chammout, 2012 <sup>2</sup>      | Cannulated Screw             | 57  | --                          | AVN: 29.8% (17/57)<br>Surgical Site Infection: 3.5% (2/57)                                | 24.6% (14/57) | 1.7% (1/57)                | 52.6% (30/57)   | 86.0% (49/57)  |
| FAITH <sup>3</sup>               | Cancellous Screw             | 551 | DVT: 1.5% (8/537)           | AVN: 9.3% (50/537)<br>Surgical Site Infection: 1.7% (9/537)                               | 6.1% (33/537) | 8.4% (45/537)              | 21.8% (117/537) | 15.5% (83/537) |
|                                  | Dynamic or Sliding Hip Screw | 557 | DVT: 1.1% (6/542)           | AVN: 5.2% (28/542)<br>Surgical Site Infection: 1.8% (10/542)                              | 6.1% (33/542) | 7.7% (42/542)              | 19.7% (107/542) | 13.5% (73/542) |
| Griffin, 2014 <sup>4</sup>       | Cannulated Screw             | 123 | DVT: 1.6% (2/123)           | AVN: 0.8% (1/123)<br>Surgical Site Infection: 4.1% (5/123)<br>Deep infection: 2.0% (1/51) | 1.6% (2/123)  | --                         | 36.4% (36/99)   | 21.1% (26/123) |

|                             |                              |    |                  |                                                                                                             |               |              |               |               |
|-----------------------------|------------------------------|----|------------------|-------------------------------------------------------------------------------------------------------------|---------------|--------------|---------------|---------------|
|                             | Targon FN System             | 51 | DVT: 2.0% (1/51) | AVN: 2.0% (1/51)<br>Surgical Site Infection: 7.8% (4/51)                                                    | 2.0% (1/51)   | --           | 31.7% (13/41) | 27.5% (14/51) |
| Kumar, 2015 <sup>5</sup>    | Cancellous Screw             | 87 | --               | AVN: 5.7% (5/87)                                                                                            | 12.6% (11/87) | --           | --            | --            |
| Rahman, 2022 <sup>6</sup>   | Cancellous Screw             | 11 | --               | AVN: 9.1% (1/11)<br>Femoral Neck Shortening: 9.1% (1/11)<br>Wound Infection: 0.0% (0/11)<br>DVT: 0% (0/11)  | 0.0% (0/11)   | --           | --            | --            |
|                             | Cannulated Screw             | 11 | --               | AVN: 0.0% (0/11)<br>Femoral Neck Shortening: 18.2% (2/11)<br>Wound Infection: 0.0% (0/11)<br>DVT: 0% (0/11) | 9.1% (1/11)   | --           | --            | --            |
| Siavashi, 2015 <sup>7</sup> | Cannulated Screw             | 28 | --               | AVN: 10.7% (3/28)                                                                                           | --            | 17.9% (5/28) | 10.7% (3/28)  | --            |
|                             | Dynamic or Sliding Hip Screw | 30 | --               | AVN: 6.7% (2/30)                                                                                            | --            | 0.0% (0/30)  | 6.7% (2/30)   | --            |
| Watson, 2013 <sup>8</sup>   | Cannulated                   | 29 | --               | --                                                                                                          | 6.9% (2/29)   | --           | 10.3% (3/29)  | 20.7%         |

|                            |                                                 |    |                       |                                                                     |              |             |               |               |
|----------------------------|-------------------------------------------------|----|-----------------------|---------------------------------------------------------------------|--------------|-------------|---------------|---------------|
|                            | Screw                                           |    |                       |                                                                     |              |             |               | (6/29)        |
|                            | Dynamic or Sliding Hip Screw                    | 31 | --                    | AVN: 3.2% (1/31)                                                    | --           | --          | 3.2% (1/31)   | 19.4% (6/31)  |
| Wei, 2020 <sup>9</sup>     | Cannulated Screw                                | 51 | DVT: 0.0% (0/51)      | AVN: 3.9% (2/51)<br>Surgical Site Infection: 0.0% (0/51)            | 9.8% (5/51)  | --          | 11.8% (6/51)  | 51.0% (26/51) |
| Yin, 2016 <sup>10</sup>    | Cannulated Screw                                | 64 | --                    | --                                                                  | 0% (0/64)    | --          | --            | --            |
| Zhang, 2022 <sup>11</sup>  | Multiple Cannulated Screw & Plate System        | 36 | --                    | AVN: 0.0% (0/36)                                                    | 2.8% (1/36)  | 2.8% (1/36) | --            | --            |
|                            | Cannulated Screw                                | 41 | --                    | AVN: 4.9% (2/41)                                                    | 7.3% (3/41)  | 9.8% (4/41) | --            | --            |
| Zhao, 2022 <sup>12</sup>   | Cannulated Screw                                | 21 | --                    | AVN: 19.1% (4/21)                                                   | 4.76% (1/21) | --          | 23.81% (5/21) | --            |
|                            | Bidirectional Pressurized Porous Tantalum Screw | 20 | --                    | AVN: 0.0% (0/20)                                                    | 0% (0/20)    | --          | --            | --            |
| <b>Comparative Study</b>   |                                                 |    |                       |                                                                     |              |             |               |               |
| Borris, 2018 <sup>13</sup> | Dynaloc                                         | 22 | Hematoma: 4.5% (1/22) | Wound Infection: 4.5% (1/22)<br>Femoral Head Necrosis: 18.2% (4/22) | --           | --          | 50.0% (11/22) | 9.1% (2/22)   |
|                            | Cancellous Screw                                | 18 | --                    | --                                                                  | --           | --          | 50.0% (9/18)  | 5.6% (1/18)   |
| Eschler,                   | Dynamic or                                      | 25 | --                    | --                                                                  | 12.0% (3/25) | 40.0%       | 32.0% (8/25)  | --            |

|                                          |                              |      |                              |                                                          |                   |                 |                   |                 |
|------------------------------------------|------------------------------|------|------------------------------|----------------------------------------------------------|-------------------|-----------------|-------------------|-----------------|
| 2014 <sup>14</sup>                       | Sliding Hip Screw            |      |                              |                                                          |                   | (10/25)         |                   |                 |
|                                          | Targon FNS                   | 27   | --                           | AVN: 3.7% (1/27)<br>Femoral Neck Shortening: 7.4% (2/27) | 3.7% (1/27)       | 18.5% (5/27)    | 14.8% (4/27)      | --              |
| <b><i>Cross-sectional Study</i></b>      |                              |      |                              |                                                          |                   |                 |                   |                 |
| Ahmed, 2022 <sup>15</sup>                | Cannulated Screw             | 35   | Wound Infection: 8.6% (3/35) | AVN: 5.7% (2/35)                                         | 2.9% (1/35)       | --              | --                | --              |
| <b><i>Prospective Cohort Studies</i></b> |                              |      |                              |                                                          |                   |                 |                   |                 |
| Alshameeri, 2017 <sup>16</sup>           | Cannulated Screw             | 1279 | --                           | AVN: 5.6% (71/1,279)                                     | 19.6% (251/1,279) | 0.8% (10/1,279) | 28.5% (364/1,279) | 5.5% (70/1,279) |
|                                          | Targon FN System             | 725  | --                           | AVN: 7.0% (51/725)                                       | 9.7% (70/725)     | 0.6% (4/725)    | 17.7% (128/725)   | 2.2% (16/725)   |
| Beder, 2021 <sup>17</sup>                | Dynamic or Sliding Hip Screw | 20   |                              | --                                                       | 5.0% (1/20)       | --              | --                | --              |
| Bisaccia, 2018 <sup>18</sup>             | Cannulated Screw             | 75   | --                           | AVN: 26.7% (20/75)                                       | 5.3% (4/75)       | --              | --                | --              |
|                                          | Dynamic or Sliding hip Screw | 42   | --                           | AVN: 28.6% (12/42)                                       | 7.1% (3/42)       | --              | --                | --              |
| Campenfeldt, 2022 <sup>39</sup>          | Cannulated Screw             | 58   | --                           | AVN: 6.9% (4/58)                                         | --                | --              | 63.8% (37/58)     | --              |
| Dong, 2019 <sup>19</sup>                 | Cancellous Screw             | 30   | --                           | AVN: 3.3% (1/30)                                         | 6.7% (2/30)       | --              | --                | --              |
|                                          | Cannulated Screw             | 30   | --                           | AVN: 10.0% (3/30)                                        | 10.0% (3/30)      | 3.3% (1/30)     | --                | --              |
| Duan, 2019 <sup>20</sup>                 | Cannulated Screw             | 23   | --                           | --                                                       | --                | --              | --                | --              |
| Guimarães,                               | Cancellous                   | 20   | --                           | AVN: 10.0%                                               | 10.0% (2/20)      | --              | --                | --              |

|                                 |                              |      |    |                                                                      |              |               |                   |                   |
|---------------------------------|------------------------------|------|----|----------------------------------------------------------------------|--------------|---------------|-------------------|-------------------|
| 2017 <sup>21</sup>              | Screw                        |      |    | (2/20)                                                               |              |               |                   |                   |
| Gupta, 2016 <sup>22</sup>       | Cannulated Screw             | 45   | -- | AVN: 6.7% (3/45)<br>Surgical Site Infection: 0.0% (0/45)             | 17.8% (8/45) | 8.9% (4/45)   | --                | --                |
|                                 | Dynamic or Sliding Hip Screw | 40   | -- | AVN: 7.5% (3/40)<br>Surgical Site Infection: 5.0% (2/40)             | 12.5% (5/40) | 12.5% (5/40)  | --                | --                |
| Imobi Singh, 2021 <sup>23</sup> | Cannulated Screw             | 47   | -- | DVT: 2.1% (1/47)<br>Wound Infection: 4.3% (2/47)<br>AVN: 6.4% (3/47) | 17.0% (8/47) | --            | --                | --                |
| Lin, 2012 <sup>24</sup>         | Cannulated Screw             | 41   | -- | AVN: 9.8% (4/41)                                                     | 4.9% (2/41)  | --            | 4.9% (2/41)       | --                |
| Nyholm, 2018 <sup>25</sup>      | Parallel Screws              | 1206 | -- | Surgical Site Infection: 0.4% (5/1,206)                              | --           | --            | 13.0% (157/1,206) | 18.9% (228/1,206) |
| Qiu, 2016 <sup>26</sup>         | Thread Needles               | 32   | -- | --                                                                   | --           | --            | --                | --                |
|                                 | Cancellous Screw             | 32   | -- |                                                                      | --           | --            | --                | --                |
| Ramadanov, 2020 <sup>27</sup>   | Cannulated Screw             | 56   | -- | AVN: 5.4% (3/56)                                                     | 5.4% (3/56)  | 33.9% (19/56) | 17.9% (10/56)     | --                |
| Sami, 2022 <sup>28</sup>        | Cannulated Screws            | 27   | -- | Femoral Neck Shortening: 14.8% (4/27)<br>AVN: 11.1% (3/27)           | 7.41% (2/27) | --            | --                | --                |



|                                  |                              |      |                  |                                                           |              |              |                                              |                                              |
|----------------------------------|------------------------------|------|------------------|-----------------------------------------------------------|--------------|--------------|----------------------------------------------|----------------------------------------------|
| Schwartzmann, 2014 <sup>29</sup> | Dynamic or Sliding Hip Screw | 96   | --               | AVN: 16.7% (16/96)                                        | 3.1% (3/96)  | --           | 3.1% (3/96)                                  | --                                           |
| Shu, 2020 <sup>30</sup>          | Cannulated Screw             | 26   | DVT: 0.0% (0/26) | AVN: 3.8% (1/26)<br>Femoral Neck Shortening: 8.9±2.3      | 7.7% (2/26)  | --           | --                                           | --                                           |
|                                  | Dynamic or Sliding Hip Screw | 28   | DVT: 0.0% (0/28) | AVN: 0.0% (0/28)<br>Femoral Neck Shortening: 6.8±2.3      | 7.1% (2/28)  | --           | --                                           | --                                           |
| Viberg, 2022 <sup>31</sup>       | Cannulated Cancellous Screw  | 1731 | --               | --                                                        | --           | --           | 1Y: 15.0% (261/1731)<br>2Y: 17.4% (301/1731) | 30D: 6.8% (118/1731)<br>1Y: 22.7% (393/1731) |
|                                  | Sliding Hip Screw            | 867  | --               | --                                                        | --           | --           | 1Y: 13.1% (114/867)<br>2Y: 15.0% (130/867)   | 30D: 8.7% (75/867)<br>1Y: 23.9% (207/867)    |
| Wang, 2021 <sup>32</sup>         | Cannulated Screw             | 60   | --               | AVN: 11.7% (7/60)                                         | --           | --           | --                                           | --                                           |
| Wani, 2014 <sup>33</sup>         | Cannulated Screw             | 50   | --               | AVN: 12.0% (6/50)<br>Surgical Site Infection: 4.0% (2/50) | 8.0% (4/50)  | --           | 20.0% (10/50)                                | 0.0% (0/50)                                  |
| Wong, 2022 <sup>34</sup>         | Cannulated Screw             | 233  | --               | AVN: 16.3% (38/233)<br>Infection: 0.0% (0/233)            | 2.6% (6/233) | 2.6% (6/233) | 10.7% (25/233)                               | 20.2% (47/233)                               |

|                              |                                    |     |    |                                                                                                                                     |              |               |                |                 |
|------------------------------|------------------------------------|-----|----|-------------------------------------------------------------------------------------------------------------------------------------|--------------|---------------|----------------|-----------------|
| Yu, 2013 <sup>35</sup>       | Cannulated Screw                   | 78  | -- | AVN: 12.8% (10/78)<br>Infection: 1.3% (1/78)<br>DVT: 0.0% (0/78)<br>Hip Varus: 2.6% (2/78)<br>Femoral Neck Shortening: 10.3% (8/78) | 2.6% (2/78)  | --            | --             | --              |
| <b>Retrospective Studies</b> |                                    |     |    |                                                                                                                                     |              |               |                |                 |
| Biber, 2014 <sup>36</sup>    | Targon FN System                   | 135 | -- | Surgical Site Infection: 0.0% (0/135)                                                                                               | 2.2% (3/135) | 9.6% (13/135) | 17.8% (24/135) | 2.2% (3/135)    |
| Bigoni, 2020 <sup>37</sup>   | Cancellous Screw                   | 244 | -- | AVN: 5.7% (14/244)<br>Surgical Site Infection: 0.41% (1/244)                                                                        | 0.4% (1/244) | 1.6% (4/244)  | --             | 50.0% (122/244) |
| Biz, 2019 <sup>38</sup>      | Cannulated Screw                   | 259 | -- | AVN: 4.2% (11/259)                                                                                                                  | 0% (0/259)   | 5.4% (14/259) | 9.7% (25/259)  | 12.0% (31/259)  |
| Chang, 2022 <sup>40</sup>    | Dynamic Compression Locking System | 26  | -- | Femoral Neck Shortening: 6.9±1.4<br>Femoral Head Necrosis: 3.8% (1/26)                                                              | 3.8% (1/26)  | --            | 7.7% (2/26)    | --              |
|                              | Dynamic or Sliding Hip Screw       | 24  | -- | Femoral Neck Shortening: 8.6±2.0<br>Femoral Head Necrosis:                                                                          | 4.2% (1/24)  | --            | 16.7% (4/24)   | --              |

|                              |                              |     |                                                          |                                                              |              |               |                                 |               |
|------------------------------|------------------------------|-----|----------------------------------------------------------|--------------------------------------------------------------|--------------|---------------|---------------------------------|---------------|
|                              |                              |     |                                                          | 12.5% (3/24)                                                 |              |               |                                 |               |
| Chen, 2017 <sup>41</sup>     | Cannulated Compression Screw | 44  | DVT: 0.0% (0/44)<br>Surgical Site Infection: 0.0% (0/44) | AVN: 9.1% (4/44)<br>Femoral Neck Shortening: 15.9% (7/44)    | 4.5% (2/44)  | 22.7% (10/44) | --                              | --            |
|                              | Dynamic Hip Screw-BLADE      | 42  | DVT: 0.0% (0/42)<br>Surgical Site Infection: 0.0% (0/42) | AVN: 7.1% (3/42)<br>Femoral Neck Shortening: 2.4% (1/42)     | 0.0% (0/42)  | 4.8 (2/42)    | --                              | --            |
| Chen, 2020 <sup>42</sup>     | Cannulated Screw             | 41  | --                                                       | AVN: 17.1% (7/41)<br>Surgical Site Infection: 2.4% (1/41)    | 9.8% (4/41)  | 4.9% (2/41)   | 31.7% (13/41)                   | 34.1% (14/41) |
| Cintean, 2021 <sup>43</sup>  | FNS (DePuy Synthes)          | 29  | --                                                       | AVN: 0.0% (0/21)<br>Femoral Neck Shortening: 3.3±4.5 (21/29) | --           | --            | 13.8% (4/29)                    | 6.9% (2/29)   |
|                              | Hemiarthroplasty             | 34  | --                                                       | --                                                           | --           | --            | 8.8% (3/34)                     | 8.8% (3/34)   |
| Davidson, 2022 <sup>44</sup> | FNS (DePuy Synthes)          | 102 | --                                                       | AVN: 2.9% (3/102)                                            | 1.0% (1/102) | 1.0% (1/102)  | Conversion to THA: 8.8% (9/102) | 0.0% (0/102)  |
| Elgeidi, 2017 <sup>45</sup>  | Dynamic or Sliding Hip Screw | 35  | Overall: 0.0% (0/35)                                     | AVN: 0.0% (0/35)<br>Deep Infection: 2.3% (1/35)              | --           | --            | 2.3% (1/35)                     | --            |
| Elmi, 2013 <sup>46</sup>     | Cannulated Screw             | 26  | DVT: 0.08% (2/26)                                        | AVN: 38.5% (10/26)                                           | 11.5% (3/26) | --            | --                              | --            |

|                              |                              |     |                                         |                                                                  |               |               |               |               |
|------------------------------|------------------------------|-----|-----------------------------------------|------------------------------------------------------------------|---------------|---------------|---------------|---------------|
|                              |                              |     |                                         | Surgical Site Infection:<br>3.9% (1/26)                          |               |               |               |               |
| Enrietti, 2020 <sup>47</sup> | Cannulated Screw             | 91  | --                                      | AVN: 6.6% (6/91)                                                 | --            | --            | --            | --            |
| Galal, 2017 <sup>48</sup>    | Cannulated Screw             | 41  | --                                      | AVN: 2.4% (1/41)<br>Surgical Site Infection:<br>2.4% (1/41)      | 4.9% (2/41)   | --            | --            | --            |
| Gruszka, 2017 <sup>49</sup>  | Targon FN System             | 62  | --                                      | --                                                               | --            | --            | --            | --            |
| Gumustas, 2018 <sup>50</sup> | Cannulated Screw             | 31  | Surgical Site Infection:<br>0.0% (0/31) | AVN: 6.5% (2/31)<br>Surgical Site Infection:<br>0.0% (0/31)      | 16.1% (5/31)  | --            | 19.4% (6/31)  | --            |
| Han, 2022 <sup>51</sup>      | Cannulated Screw             | 384 | --                                      | AVN: 7.6% (29/384)<br>Femoral Neck Shortening:<br>18.0% (69/384) | 4.9% (19/384) | 6.3% (24/384) | --            | --            |
| He, 2019 <sup>52</sup>       | Cannulated Screw             | 30  | --                                      | AVN: 10.0% (3/30)                                                | 3.3% (1/30)   | 10.0% (3/30)  | --            | --            |
| He, 2021 <sup>53</sup>       | Cannulated Screw             | 36  | --                                      | --                                                               | 5.6% (2/36)   | 8.3% (3/36)   | --            | --            |
|                              | FNS (DePuy Synthes)          | 33  | --                                      | --                                                               | 0.0% (0/33)   | 3.0% (1/33)   | --            | --            |
| Hiranaka, 2021 <sup>54</sup> | Dynamic or Sliding Hip Screw | 66  | --                                      | AVN: 9.1% (6/66)                                                 | 6.1% (4/66)   | 4.5% (3/66)   | 22.7% (15/66) | 36.4% (24/66) |
| Hu, 2021 <sup>55</sup>       | Cannulated                   | 24  | --                                      | AVN: 12.5%                                                       | 12.5% (3/24)  | --            | --            | --            |

|                            |                                          |       |                                      |                                                                         |                   |    |                     |                      |
|----------------------------|------------------------------------------|-------|--------------------------------------|-------------------------------------------------------------------------|-------------------|----|---------------------|----------------------|
|                            | Screw                                    |       |                                      | (3/24)                                                                  |                   |    |                     |                      |
|                            | FNS (DePuy Synthes)                      | 20    | --                                   | AVN: 5.0% (1/20)                                                        | 10.0% (2/20)      | -- | --                  | --                   |
| Huang, 2020 <sup>56</sup>  | Cannulated Screw                         | 67    | Surgical Site Infection: 0.0% (0/67) | AVN: 20.9% (14/67)<br>Surgical Site Infection: 0.0% (0/67)              | 0.0% (0/67)       | -- | --                  | --                   |
| Huang, 2022 <sup>57</sup>  | Multiple Cannulated Screw & Plate System | 48    |                                      | Femoral Neck Shortening: 1.40±1.73 (18.8% [9/48])<br>AVN: 4.2% (2/48)   | 6.3% (3/48)       | -- | --                  | --                   |
|                            | Cannulated Screw                         | 54    |                                      | Femoral Neck Shortening: 4.33±3.32 (44.4% [24/54])<br>AVN: 11.1% (6/54) | 9.3% (5/54)       | -- | --                  | --                   |
| Jettoo, 2016 <sup>58</sup> | Cancellous Screw                         | 34870 | DVT: 0.01% (258/34,870)              | AVN: 0.1% (22/34,870)<br>Surgical Site Infection: 0.4% (135/34,870)     | 1.6% (557/34,870) | -- | 8.3% (2,905/34,870) | 8.6% (2,999/34,870)  |
|                            | Dynamic or Sliding Hip Screw             | 18014 | DVT: 0.01% (165/18,014)              | AVN: 0.1% (18/18,014)<br>Surgical Site Infection: 0.4% (80/18,014)      | 1.1% (211/18,014) | -- | 5.5% (984/18,014)   | 10.4% (1,873/18,014) |

|                              |                                |     |                                        |                                                                |              |               |                |                |
|------------------------------|--------------------------------|-----|----------------------------------------|----------------------------------------------------------------|--------------|---------------|----------------|----------------|
| Jin, 2022 <sup>59</sup>      | Percutaneous Compression Plate | 51  | --                                     | AVN: 9.8% (5/51)<br>DVT: 2.0% (1/51)<br>Infection: 2.0% (1/51) | 2.0% (1/51)  | --            | 7.8% (4/51)    | --             |
| Ju, 2020 <sup>60</sup>       | Cannulated Screw               | 73  | --                                     | AVN: 9.6% (7/73)                                               | 1.4% (1/73)  | --            | 5.5% (4/73)    | --             |
| Kain, 2014 <sup>61</sup>     | Cannulated Screw               | 120 | --                                     | --                                                             | 5.0% (6/120) | --            | 13.3% (16/120) | 42.5% (51/120) |
| Kalsbeek, 2018 <sup>62</sup> | Dynamic or Sliding Hip Screw   | 106 | Surgical Site Infection: 0.01% (1/106) | AVN: 10.4% (11/106)<br>Surgical Site Infection: 0.9% (1/106)   | 5.7% (6/106) | --            | 13.2% (14/106) | 0.0% (0/106)   |
| Kang, 2016 <sup>63</sup>     | Cannulated Screw               | 84  | --                                     | AVN: 10.7% (9/84)                                              | 7.1% (6/84)  | 10.7% (9/84)  | --             | --             |
| Khoo, 2014 <sup>64</sup>     | Cannulated Screw               | 53  | --                                     | AVN: 17.0% (9/53)                                              | 1.9% (1/53)  | --            | 5.7% (3/53)    | --             |
| Kilian, 2018 <sup>65</sup>   | Targon FN System               | 82  | --                                     | AVN: 6.1% (5/82)                                               | 2.4% (2/82)  | 13.4% (11/82) | 17.1% (14/82)  | --             |
| Kim, 2014 <sup>66</sup>      | Cannulated Screw               | 60  | --                                     | AVN: 6.7% (4/60)                                               | --           | 1.7% (1/60)   | 7.4% (4/54)    | 6.7% (4/60)    |
| Kim, 2015 <sup>67</sup>      | Cannulated Screw               | 52  | --                                     | AVN: 2.3% (12/52)                                              | 9.6% (5/52)  | --            | 30.8% (16/52)  | --             |
| Kosola, 2017 <sup>68</sup>   | Cannulated Screw               | 12  | --                                     | Surgical Site Infection: 0.0% (0/12)                           | --           | 58.3% (7/12)  | 58.3% (7/12)   | --             |
|                              | Dynamic or Sliding Hip Screw   | 24  | --                                     | Surgical Site Infection: 0.0% (0/24)                           | --           | 12.5% (3/24)  | 12.5% (3/24)   | --             |
| Lin, 2022 <sup>69</sup>      | Multiple Cannulated            | 27  | --                                     | AVN: 0.0% (0/27)                                               | 7.4% (2/27)  | 3.7% (1/27)   | 7.4% (2/27)    | --             |

|                              |                              |     |                                      |                                                          |              |              |              |                |
|------------------------------|------------------------------|-----|--------------------------------------|----------------------------------------------------------|--------------|--------------|--------------|----------------|
|                              | Screw & Plate System         |     |                                      |                                                          |              |              |              |                |
| Ma, 2022 <sup>70</sup>       | Cannulated Screw             | 47  | Surgical Site Infection: 0.0% (0/47) | AVN: 2.1% (1/47)<br>Surgical Site Infection: 0.0% (0/47) | 10.6% (5/47) | 10.6% (5/47) | --           | --             |
| Makki, 2013 <sup>71</sup>    | Dynamic or Sliding Hip Screw | 31  | Surgical Site Infection: 0.0% (0/31) | AVN: 6.5% (2/31)<br>Surgical Site Infection: 0.0% (0/31) | 3.2% (1/31)  | --           | --           | 12.9% (4/31)   |
| Manohara, 2014 <sup>72</sup> | Cancellous Screw             | 100 | DVT: 0.04% (4/96)                    | AVN: 5.2% (5/96)<br>Hematoma: 0.01% (1/100)              | 3.1% (3/96)  | --           | 8.0% (8/100) | 18.0% (18/100) |
| Mubark, 2021 <sup>73</sup>   | Cannulated Screw             | 56  | --                                   | --                                                       | 5.4% (3/56)  | 1.8% (1/56)  | 5.4% (3/56)  | --             |
| Mue, 2013 <sup>74</sup>      | Dynamic or Sliding Hip Screw | 43  | --                                   | Surgical Site Infection: 9.3% (4/43)                     | --           | --           | 9.3% (4/43)  | 2.3% (1/43)    |
| Mukka, 2020 <sup>75</sup>    | Cannulated Screw             | 65  | --                                   | Surgical Site Infection: 0.0% (0/65)                     | 9.2% (6/65)  | --           | 13.8% (9/65) | 30.8% (20/65)  |
| Nibe, 2021 <sup>76</sup>     | Cannulated Screw             | 27  | --                                   | --                                                       | 18.5% (5/27) | 7.4% (2/27)  | 22.2% (6/27) | --             |
|                              | FNS (DePuy Synthes)          | 25  | --                                   | --                                                       | 0.0% (0/25)  | --           | 0.0% (0/25)  | --             |
| Niemann, 2022 <sup>77</sup>  | Dynamic or Sliding Hip Screw | 19  | --                                   | AVN: 0.0% (0/19)<br>Femoral Neck Shortening: 0.0% (0/19) | --           | --           | --           | --             |

|                                 |                              |     |    |                                                                                                                       |                |                |                                                                    |                 |
|---------------------------------|------------------------------|-----|----|-----------------------------------------------------------------------------------------------------------------------|----------------|----------------|--------------------------------------------------------------------|-----------------|
|                                 | FNS (DePuy Synthes)          | 12  | -- | AVN: 0.0% (0/12)<br>Femoral Neck Shortening: 0.0% (0/12)                                                              | --             | --             | --                                                                 | --              |
| Osarumwense, 2015 <sup>78</sup> | Targon FN System             | 51  | -- | AVN: 0.1% (3/51)                                                                                                      | 2.0% (1/51)    | --             | 7.8% (4/51)                                                        | --              |
| Parker, 2013 <sup>79</sup>      | Targon FN System             | 320 | -- | AVN: 8.8% (28/320)<br>Surgical Site Infection: 0.9% (3/320)                                                           | 10.9% (35/320) | --             | 20.0% (64/320)                                                     | 34.1% (109/320) |
| Patterson, 2020 <sup>80</sup>   | Cannulated Screw             | 234 | -- | Surgical Site Infection: 2.6% (6/234)                                                                                 | 9.8% (23/234)  | 6.4% (15/234)  | 26.9% (63/234)                                                     | --              |
| Qiu, 2022 <sup>81</sup>         | Cannulated Screw             | 190 | -- | --                                                                                                                    | --             | --             | 17.4% (33/190)                                                     | --              |
| Riaz, 2016 <sup>82</sup>        | Cannulated Screw             | 251 | -- | AVN: 4.0% (10/251)                                                                                                    | 4.8% (12/251)  | 6.0% (15/251)  | 12.0% (30/251)                                                     | --              |
| Schuetze, 2022 <sup>83</sup>    | Dynamic or Sliding hip screw | 108 |    | Femoral Neck Shortening: 4.8±2.1 mm 27.7% (30/108)<br>Hematoma: 5.6% (6/108)<br>Surgical Site Infection: 2.8% (3/108) | --             | 10.2% (11/108) | Conversion to THA: 8.3% (9/108)<br>Implant removal: 1.9% (2/108)   | 0.9% (1/108)    |
|                                 | FNS (DePuy Synthes)          | 113 |    | Femoral Neck Shortening: 5.3±1.9 mm 27.4% (31/113)<br>Hematoma: 0.9% (1/113)                                          | --             | 12.4% (14/113) | Conversion to THA: 11.5% (13/113)<br>Implant removal: 0.9% (1/113) | 3.5% (4/113)    |



|                                  |                              |      |    |                                       |                 |              |                                                                 |                   |
|----------------------------------|------------------------------|------|----|---------------------------------------|-----------------|--------------|-----------------------------------------------------------------|-------------------|
|                                  |                              |      |    | Surgical Site Infection: 0.0% (0/113) |                 |              |                                                                 |                   |
| Schwartzmann, 2018 <sup>84</sup> | Dynamic or Sliding Hip Screw | 53   | -- | AVN: 25.3% (13/53)                    | 1.9% (1/53)     | --           | --                                                              | --                |
| Shields, 2014 <sup>85</sup>      | Cannulated Screw             | 119  | -- | --                                    | --              | --           | 13.4% (16/119)                                                  | 30.3% (36/119)    |
| Sjöholm, 2021 <sup>86</sup>      | Cannulated Screw             | 1505 | -- | AVN: 7.6% (115/1,505)                 | 3.7% (56/1,505) | --           | 16.7% (251/1,505)                                               | 34.0% (512/1,505) |
| Stassen, 2021 <sup>87</sup>      | FNS (DePuy Synthes)          | 34   | -- | AVN: 11.8% (4/34)                     | --              | 5.9% (2/34)  | Conversion to THA: 17.6% (6/34)<br>Implant removal: 5.9% (2/34) | 0.0% (0/34)       |
| Sundkvist, 2022 <sup>88</sup>    | Cannulated Screw             | 93   | -- | AVN: 1.1% (1/93)                      | 1.1% (1/93)     | 2.2% (2/93)  | 6.5% (6/93)                                                     | 20.4% (19/93)     |
| Takigawa, 2016 <sup>89</sup>     | Targon FN System             | 84   | -- | AVN: 8.3% (7/84)                      | 1.2% (1/84)     | --           | 29.8% (25/84)                                                   | 38.1% (/84)       |
| Tang, 2021 <sup>90</sup>         | Cannulated Screw             | 45   | -- | AVN: 6.7% (3/45)                      | 8.9% (4/45)     | 4.4% (2/45)  | --                                                              | --                |
|                                  | FNS (DePuy Synthes)          | 47   | -- | AVN: 2.1% (1/47)                      | 4.3% (2/47)     | 6.4% (3/47)  | --                                                              | --                |
| Vazquez, 2021 <sup>91</sup>      | Cannulated Screw             | 32   | -- | --                                    | --              | --           | --                                                              | 9.4% (3/32)       |
|                                  | Dynamic or Sliding Hip Screw | 16   | -- | --                                    | --              | --           | --                                                              | 12.5% (2/16)      |
|                                  | FNS (DePuy Synthes)          | 15   | -- | --                                    | --              | --           | --                                                              | 0.0% (0/15)       |
| Wan, 2021 <sup>92</sup>          | Cannulated Screw             | 21   | -- | AVN: 0.0% (0/21)                      | --              | 14.3% (3/21) | --                                                              | --                |

|                            |                                          |     |                                         |                                                                |                  |                |                   |    |
|----------------------------|------------------------------------------|-----|-----------------------------------------|----------------------------------------------------------------|------------------|----------------|-------------------|----|
| Wang, 2014 <sup>93</sup>   | Cannulated Screw                         | 146 | --                                      | AVN: 14.4%<br>(21/146)                                         | --               | --             | 47.3%<br>(69/146) | -- |
| Wang, 2015 <sup>94</sup>   | Cannulated Screw                         | 209 | --                                      | AVN: 11.5%<br>(24/209)                                         | 7.2%<br>(15/209) | --             | --                | -- |
| Wang, 2018 <sup>95</sup>   | Cancellous Screw                         | 34  | --                                      | --                                                             | 23.5% (8/34)     | 2.9%<br>(1/34) | 26.5% (9/34)      | -- |
|                            | Multiple Cancellous Screw & Plate System | 34  | --                                      | --                                                             | 5.9% (2/34)      | 8.8%<br>(3/34) | 8.8% (3/34)       | -- |
| Wang, 2019 <sup>96</sup>   | Cannulated Screw                         | 65  | Surgical Site Infection:<br>0.0% (0/65) | AVN: 1.5%<br>(1/65)<br>Surgical Site Infection:<br>0.0% (0/65) | --               | 3.1%<br>(2/65) | --                | -- |
| Wang, 2022 <sup>97</sup>   | Cannulated Screw                         | 153 | --                                      | AVN: 24.8%<br>(38/153)                                         | --               | --             | --                | -- |
| Wenbo, 2014a <sup>98</sup> | Dynamic Hip System Blade                 | 60  | --                                      | AVN: 0.0%<br>(0/60)<br>Femoral Neck Shortening:<br>0.0% (0/60) | 1.7% (1/60)      | 0% (0/60)      | --                | -- |
| Wenbo, 2014b <sup>99</sup> | Dynamic or Sliding Hip Screw             | 42  | --                                      | DVT: 0.0%<br>(0/42)                                            | --               | 7.1%<br>(3/42) | --                | -- |
| Xiao, 2018 <sup>100</sup>  | Dynamic or Sliding Hip Screw             | 36  | --                                      | --                                                             | --               | --             | 0.0% (0/36)       | -- |
| Xu, 2022a <sup>101</sup>   | Cancellous Screw                         | 51  | --                                      | AVN: 0.0%<br>(0/51)<br>DVT: 0.0%<br>(0/51)<br>Femoral Neck     | --               | 3.9%<br>(2/51) | --                | -- |

|                           |                                               |    |                                                  |                                                                                   |              |              |    |    |
|---------------------------|-----------------------------------------------|----|--------------------------------------------------|-----------------------------------------------------------------------------------|--------------|--------------|----|----|
|                           |                                               |    |                                                  | Shortening: 1.9 mm (0.2-3.5)                                                      |              |              |    |    |
|                           | Dynamic or Sliding Hip Screw                  | 52 | --                                               | AVN: 0.0% (0/52)<br>DVT: 0.0% (0/52)<br>Femoral Neck Shortening: 2.0 mm (0.2-4.8) | --           | 3.8% (2/52)  | -- | -- |
|                           | FNS (DePuy Synthes)                           | 54 | --                                               | AVN: 0.0% (0/54)<br>DVT: 0.0% (0/54)<br>Femoral Neck Shortening: 2.2 mm (0.4-4.1) | --           | 5.6% (3/54)  | -- | -- |
| Xu, 2022b <sup>102</sup>  | Sliding Fixation (Three Cannulated Screws)    | 60 | Wound Infection: 0.0% (0/60)<br>DVT: 0.0% (0/60) | AVN: 0.0% (0/60)<br>Femoral Neck Shortening: 26.7% (16/60)                        | --           | 5.0% (3/60)  | -- | -- |
|                           | Non-sliding Fixation (Four Cannulated Screws) | 42 | Wound Infection: 0.0% (0/42)<br>DVT: 0.0% (0/42) | AVN: 0.0% (0/42)<br>Femoral Neck Shortening: 21.4% (9/42)                         | --           | 4.8% (2/42)  | -- | -- |
| Yang, 2022 <sup>103</sup> | Parallel Cannulated Screws                    | 10 | Infection: 0.0% (0/10)                           | --                                                                                | 0% (0/10)    | --           | -- | -- |
| Ye, 2017 <sup>104</sup>   | Cannulated Screw                              | 28 | --                                               | AVN: 0.0% (0/28)<br>Surgical Site Infection:                                      | 10.7% (3/28) | 10.7% (3/28) | -- | -- |

|                                |                              |     |    |                                        |                |               |                |    |
|--------------------------------|------------------------------|-----|----|----------------------------------------|----------------|---------------|----------------|----|
|                                |                              |     |    | 0.0% (0/28)                            |                |               |                |    |
| Yoon, 2021 <sup>105</sup>      | Multiple Cannulated Screws   | 6   | -- | AVN: 0.0% (0/6)                        | 0% (0/6)       | --            | --             | -- |
|                                | Dynamic or Sliding Hip Screw | 2   | -- | AVN: 0.0% (0/2)                        | 0% (0/2)       | --            | --             | -- |
| Yoshikawa, 2022 <sup>106</sup> | Sliding Hip Screw (TresLock) | 10  | -- | --                                     | 10% (1/10)     | --            | 10% (1/10)     | -- |
| Yuan, 2022 <sup>107</sup>      | Cannulated Screw             | 113 | -- | Osteonecrosis: 22.1% (25/113)          | 15.9% (18/113) | 8.8% (10/113) | 24.8% (28/113) | -- |
| Zhang, 2022 <sup>108</sup>     | Cannulated Screw             | 36  | -- | Femoral Neck Shortening: 13.89% (5/36) | --             | 13.89% (5/36) | 0.0% (0/36)    |    |
|                                | FNS (DePuy Synthes)          | 33  | -- | Femoral Neck Shortening: 6.06% (2/33)  | --             | 0.0% (0/33)   | 0.0% (0/33)    |    |
| Zhao, 2014a <sup>109</sup>     | Dynamic or Sliding Hip Screw | 42  | -- | --                                     | --             | 7.1% (3/42)   | --             | -- |
| Zhao, 2014b <sup>110</sup>     | Dynamic or Sliding Hip Screw | 60  | -- | --                                     | 1.7% (1/60)    | 0.0% (0/60)   | --             | -- |
| Zhao, 2021 <sup>111</sup>      | Cancellous Screw             | 122 | -- | --                                     | 12.3% (15/122) | --            | --             | -- |
| Zhou, 2021 <sup>112</sup>      | Cannulated Screw             | 51  | -- | --                                     | --             | --            | --             | -- |
|                                | FNS (DePuy Synthes)          | 30  | -- | --                                     | --             | --            | --             | -- |
| Zhu, 2021 <sup>113</sup>       | Cannulated Screw             | 83  | -- | AVN: 24.1% (20/83)                     | 7.2% (6/83)    | --            | --             | -- |

|                              |                              |    |                                                             |                   |             |             |             |     |
|------------------------------|------------------------------|----|-------------------------------------------------------------|-------------------|-------------|-------------|-------------|-----|
| Zhu, 2022a <sup>114</sup>    | Dynamic or Sliding Hip Screw | 68 | --                                                          | AVN: 8.8% (6/68)  | 2.9% (2/68) | 5.9% (4/68) | --          | --  |
| Zhu, 2022b <sup>115</sup>    | Cannulated Screw             | 91 | Infection: 0.0% (0/91)<br>Cortical Perforation: 0.0% (0/91) | AVN: 6.6% (6/91)  | 5.5% (5/91) | 7.7% (7/91) | 6.6% (6/91) | --* |
| Zhuang, 2019 <sup>116</sup>  | Cannulated Screw             | 26 | --                                                          | AVN: 7.7% (2/26)  | 0.0% (0/26) | --          | --          | --  |
| <b>Case Series</b>           |                              |    |                                                             |                   |             |             |             |     |
| Faisham, 2021 <sup>117</sup> | Dynamic or Sliding Hip Screw | 10 | --                                                          | AVN: 20.0% (2/10) | 0.0% (0/10) | --          | --          | --  |

Data are expressed as mean±SD, median (IQR), or % (n) unless otherwise indicated. "--" indicates no data reported.

AVN, avascular necrosis of the femoral head; DVT, deep vein thrombosis; FN, femoral neck; FNS, femoral neck system; DePuy Synthes, Johnson & Johnson.

\*Of the initial 112 patients reviewed, 8 died and were excluded from the study analysis.

**Supplemental Table 7.** Risk of bias assessment results for included studies

| Study                       | Selection                                |                                     |                           |                                                                          | Comparability                                                   | Outcome               |                                                 |                                  | Overall     |                                               |
|-----------------------------|------------------------------------------|-------------------------------------|---------------------------|--------------------------------------------------------------------------|-----------------------------------------------------------------|-----------------------|-------------------------------------------------|----------------------------------|-------------|-----------------------------------------------|
|                             | Representativeness of the exposed cohort | Selection of the non-exposed cohort | Ascertainment of exposure | Demonstration that outcome of interest was not present at start of study | Comparability of cohorts on the basis of the design or analysis | Assessment of outcome | Was follow-up long enough for outcomes to occur | Adequacy of follow-up of cohorts | Total Score | How well was the study done to minimize bias? |
| Cintean, 2021 <sup>43</sup> | 1                                        | 1                                   | 1                         | 1                                                                        | 0                                                               | 1                     | 0                                               | 0                                | 5           | High risk                                     |

|                               |   |   |   |   |   |   |   |   |   |               |
|-------------------------------|---|---|---|---|---|---|---|---|---|---------------|
| He, 2021 <sup>53</sup>        | 1 | 1 | 1 | 1 | 1 | 1 | 0 | 1 | 7 | Moderate risk |
| Hu, 2021 <sup>55</sup>        | 1 | 1 | 1 | 1 | 0 | 1 | 0 | 1 | 6 | High risk     |
| Nibe, 2021 <sup>76</sup>      | 1 | 0 | 1 | 1 | 0 | 1 | 0 | 1 | 5 | High risk     |
| Niemann, 2022 <sup>77</sup>   | 0 | 0 | 1 | 1 | 1 | 1 | 1 | 0 | 5 | Moderate risk |
| Schuetze, 2022 <sup>118</sup> | 1 | 1 | 1 | 1 | 0 | 1 | 0 | 0 | 5 | High risk     |
| Tang, 2021 <sup>90</sup>      | 1 | 1 | 1 | 1 | 1 | 1 | 1 | 1 | 8 | Low risk      |
| Vazquez, 2021 <sup>91</sup>   | 1 | 1 | 1 | 1 | 1 | 1 | 0 | 0 | 6 | High risk     |
| Xu, 2022 <sup>101</sup>       | 0 | 0 | 1 | 1 | 0 | 1 | 0 | 0 | 3 | High risk     |
| Zhang, 2022 <sup>108</sup>    | 0 | 0 | 1 | 1 | 0 | 1 | 0 | 0 | 3 | High risk     |
| Zhou, 2021 <sup>112</sup>     | 1 | 1 | 1 | 1 | 1 | 1 | 0 | 1 | 7 | Low risk      |

## REFERENCES

1. Bartels S, Kristensen TB, Gjertsen J-E, et al. Total Hip Arthroplasty Leads to Better Results After Low-Energy Displaced Femoral Neck Fracture in Patients Aged 55 to 70 Years: A Randomized Controlled Multicenter Trial Comparing Internal Fixation and Total Hip Arthroplasty. *J Bone Joint Surg Am.* 2022-08-03 104(15)doi:10.2106/jbjs.21.01411
2. Chammout GK, Mukka SS, Carlsson T, Neander GF, Stark AW, Skoldenberg OG. Total hip replacement versus open reduction and internal fixation of displaced femoral neck fractures: a randomized long-term follow-up study. *J Bone Joint Surg Am.* Nov 7 2012;94(21):1921-8. doi:10.2106/jbjs.K.01615

3. Fracture fixation in the operative management of hip fractures (FAITH): an international, multicentre, randomised controlled trial. *Lancet (London, England)*. Apr 15 2017;389(10078):1519-1527. doi:10.1016/s0140-6736(17)30066-1
4. Griffin XL, Parsons N, Achten J, Costa ML. the Targon femoral neck hip screw versus cannulated screws for internal fixation of intracapsular fractures of the hip: a randomised controlled trial. *The bone & joint journal*. May 2014;96-b(5):652-7. doi:10.1302/0301-620x.96b5.33391
5. Kumar S, Bharti A, Rawat A, Kumar V, Avasthi S. Comparative study of fresh femoral neck fractures managed by multiple cancellous screws with and without fibular graft in young adults. *None*. 2015-01-01 6(1)doi:10.1016/j.jcot.2014.12.008
6. Rahman MA, Abdelazim H, Ishak S, Desoky AA. Comparison of Transverse Cancellous Lag Screw and Ordinary Cannulated Screw Fixations in Treatment of Vertical Femoral Neck Fractures. *None*. 2022-01-01 6(1)doi:10.53350/pjmhs221611191
7. Siavashi B, Aalirezai A, Moosavi M, Golbakhsh MR, Savadkoohi D, Zehtab MJ. A comparative study between multiple cannulated screws and dynamic hip screw for fixation of femoral neck fracture in adults. *International orthopaedics*. Oct 2015;39(10):2069-71. doi:10.1007/s00264-015-2881-9
8. Watson A, Zhang Y, Beattie S, Page RS. Prospective randomized controlled trial comparing dynamic hip screw and screw fixation for undisplaced subcapital hip fractures. *ANZ journal of surgery*. Sep 2013;83(9):679-83. doi:10.1111/j.1445-2197.2012.06256.x
9. Wei P, Xu Y, Gu Y, Geng D, Yao Q, Wang L. Conservative vs Surgical Treatment of Impacted Femoral Neck Fracture in Patients 75 Years and Older. *Journal of the American Geriatrics Society*. Oct 2020;68(10):2214-2221. doi:10.1111/jgs.16535
10. Yin W, Xu H, Xu P, et al. A Novel Guidewire Aiming Device to Improve the Accuracy of Guidewire Insertion in Femoral Neck Fracture Surgery Using Cannulated Screw Fixation. *None*. 2016-01-01 22(None)doi:10.12659/msm.897120
11. Zhang J, Zhuang Y, Dai L, Huang D. A Comparative Study between Proximal Femoral Locking Plate and Multiple Cannulated Screws for Fixation of Femoral Neck Fractures in Young Adults. *J Healthc Eng*. 2022-01-01 2022(None)doi:10.1155/2022/1286419
12. Zhao D, Ma Z, Liu B, et al. A New Method to Protect Blood Supply in the Treatment of Femoral Neck Fractures: Bidirectional Compression Porous Tantalum Screws. *Orthop Surg*. 2022-07-18 None(None)doi:10.1111/os.13285
13. Borris L, Thorninger R, Brink O. A randomized comparison between first-generation dynaloc and cancellous screws for treatment of femoral neck fractures. *None*. 2018-01-01 None(None)doi:None
14. Eschler A, Brandt S, Gierer P, Mittlmeier T, Gradl G. Angular stable multiple screw fixation (Targon FN) versus standard SHS for the fixation of femoral neck fractures. *Injury*. Jan 2014;45 Suppl 1:S76-80. doi:10.1016/j.injury.2013.10.026
15. Ahmed M, Bux M, Hussain G, Kumar M, Ahmed N. Functional Outcome Of Delayed Presenting Fracture Neck Of Femur Managed By Cannulated Screw And Fibular Graft. *J Ayub Med Coll Abbottabad*. 2022-01-01 34(1)doi:10.55519/jamc-01-8122
16. Alshameeri Z, Elbashir M, Parker MJ. The outcome of intracapsular hip fracture fixation using the Targon Femoral Neck (TFN) locking plate system or cannulated cancellous screws: A comparative study involving 2004 patients. *Injury*. Nov 2017;48(11):2555-2562. doi:10.1016/j.injury.2017.08.063

17. Beder FK, El-Hamalawy AG, Abdel-Kader KFM, Abdelmoneim MA. Results of fixed-angle device fixation (dynamic hip screw) in femoral neck fractures in young adults: A prospective study of 20 cases. *Curr Orthop Pract.* 2021-01-01 32(4)doi:10.1097/bco.0000000000001008
18. Bisaccia M, Ceccarini P, Rinonapoli G, et al. Dhs plus anti-rotational screw vs cannulated screws for femoral neck fractures: an analysis of clinical outcome and incidence regarding avn. *Acta orthopaedica Belgica.* Sep 2018;84(3):279-283.
19. Dong Q, Han Z, Zhang YG, Sun X, Ma XL. Comparison of Transverse Cancellous Lag Screw and Ordinary Cannulated Screw Fixations in Treatment of Vertical Femoral Neck Fractures. *Orthop Surg.* Aug 2019;11(4):595-603. doi:10.1111/os.12503
20. Duan SJ, Liu HS, Wu WC, Yang K, Zhang Z, Liu SD. Robot-assisted Percutaneous Cannulated Screw Fixation of Femoral Neck Fractures: Preliminary Clinical Results. *Orthop Surg.* Feb 2019;11(1):34-41. doi:10.1111/os.12430
21. Guimarães JAM, Rocha LR, Noronha Rocha TH, et al. Vertical femoral neck fractures in young adults: a closed fixation strategy using a transverse cancellous lag screw. *Injury.* Oct 2017;48 Suppl 4:S10-s16. doi:10.1016/s0020-1383(17)30769-6
22. Gupta M, Arya RK, Kumar S, Jain VK, Sinha S, Naik AK. Comparative study of multiple cancellous screws versus sliding hip screws in femoral neck fractures of young adults. *Chinese journal of traumatology = Zhonghua chuang shang za zhi.* Aug 1 2016;19(4):209-12. doi:10.1016/j.cjtee.2015.11.021
23. Imobi Singh C, Gonmei L, Banikanta Sharma C, Biju Singh S. Evaluation of Biplane Double Supported Screw Fixation of Femoral Neck Fracture: A Longitudinal Study at a Tertiary Health Care Center in Manipur. *Trends Med Res.* 2021-01-01 16(2)doi:10.3923/tmr.2021.48.54
24. Lin D, Lian K, Ding Z, Zhai W, Hong J. Proximal femoral locking plate with cannulated screws for the treatment of femoral neck fractures. *Orthopedics.* Jan 16 2012;35(1):e1-5. doi:10.3928/01477447-20111122-08
25. Nyholm AM, Palm H, Sandholdt H, Troelsen A, Gromov K. Osteosynthesis with Parallel Implants in the Treatment of Femoral Neck Fractures: Minimal Effect of Implant Position on Risk of Reoperation. *J Bone Joint Surg Am.* Oct 3 2018;100(19):1682-1690. doi:10.2106/jbjs.18.00270
26. Qiu S, Zhu T, Song L, Bo Y, An W, Yang H. Internal fixation with cancellous bone screws is effective for femoral neck fractures by lowering the incidence of femoral head necrosis. *None.* 2016-01-01 9(2)doi:None
27. Ramadanov N, Toma I, Herkner H, Klein R, Behringer W, Matthes G. Factors that influence the complications and outcomes of femoral neck fractures treated by cannulated screw fixation. *Scientific reports.* Jan 20 2020;10(1):758. doi:10.1038/s41598-020-57696-2
28. Sami A, Prabhakar R, Kumar Yadav A, Kumar Jain V. Biplane double supported screw fixation for femoral neck fracture in young adults: A prospective cohort study. *J Orthop.* 2022-01-01 33(None)doi:10.1016/j.jor.2022.07.012
29. Schwartsmann CR, Jacobus LS, Spinelli Lde F, et al. Dynamic hip screw for the treatment of femoral neck fractures: a prospective study with 96 patients. *ISRN orthopedics.* 2014;2014:257871. doi:10.1155/2014/257871



30. Shu DP, Xiao YP, Bei MJ, et al. Dynamic compression locking system versus multiple cannulated compression screw for the treatment of femoral neck fractures: a comparative study. *BMC musculoskeletal disorders*. Apr 13 2020;21(1):230. doi:10.1186/s12891-020-03259-5
31. Viberg B, Barat S, Rotwitt L, Gundtoft PH, collaborators D. Reoperation for sliding hip screws vs cannulated cancellous screws in femoral neck fractures: A study from the Danish Fracture Database Collaborators. *Injury*. Nov 2022;53(11):3805-3809. doi:10.1016/j.injury.2022.09.029
32. Wang S, Wang B, Lan X, et al. Application of a Personalized Finite Element Analysis and 3D-Printed Navigation Template in the Treatment of Femoral Neck Fracture with Cannulated Screw. *None*. 2021-01-01 None(None)doi:10.1007/s40846-021-00667-3
33. Wani IH, Sharma S, Latoo I, Salaria AQ, Farooq M, Jan M. Primary total hip arthroplasty versus internal fixation in displaced fracture of femoral neck in sexa- and septuagenarians. *Journal of orthopaedics and traumatology : official journal of the Italian Society of Orthopaedics and Traumatology*. Sep 2014;15(3):209-14. doi:10.1007/s10195-013-0278-3
34. Wong RMY, Zu Y, Chau WW, et al. High Charlson Comorbidity Index Score is associated with early fracture-related complication for internal fixation of neck of femur fractures. *Scientific reports*. 2022-03-19 12(1)doi:10.1038/s41598-022-08855-0
35. Yu XB, Zhao DW, Zhong SZ, et al. Prospective and comparative analysis of internal fixation of femoral neck fractures with or without vascularized iliac graft in young adults. *None*. 2013-01-01 36(2)doi:10.3928/01477447-20130122-12
36. Biber R, Brem M, Bail HJ. Targon Femoral Neck for femoral-neck fracture fixation: lessons learnt from a series of one hundred and thirty five consecutive cases. *International orthopaedics*. Mar 2014;38(3):595-9. doi:10.1007/s00264-013-2176-y
37. Bigoni M, Turati M, Leone G, et al. Internal fixation of intracapsular femoral neck fractures in elderly patients: mortality and reoperation rate. *Aging clinical and experimental research*. Jun 2020;32(6):1173-1178. doi:10.1007/s40520-019-01237-z
38. Biz C, Tagliapietra J, Zonta F, Belluzzi E, Bragazzi NL, Ruggieri P. Predictors of early failure of the cannulated screw system in patients, 65 years and older, with non-displaced femoral neck fractures. *Aging Clin Exp Res*. 2020-01-01 32(3)doi:10.1007/s40520-019-01394-1
39. Campenfeldt P, Al-Ani A, Ekström W, et al. Function, sarcopenia and osteoporosis 10 years after a femoral neck fracture in patients younger than 70 years. *Injury*. 2022-04-01 53(4)doi:10.1016/j.injury.2021.12.030
40. Chang J-Z, Xiao Y-P, Li L, Bei M-J. The efficacy of dynamic compression locking system vs. dynamic hip screw in the treatment of femoral neck fractures: a comparative study. *BMC musculoskeletal disorders*. 2022-07-12 23(1)doi:10.1186/s12891-022-05631-z
41. Chen C, Yu L, Tang X, et al. Dynamic hip system blade versus cannulated compression screw for the treatment of femoral neck fractures: A retrospective study. *Acta Orthop Traumatol Turc*. Oct 2017;51(5):381-387. doi:10.1016/j.aott.2017.07.006
42. Chen JY, She GR, Luo SM, et al. Hemiarthroplasty compared with internal fixation for treatment of nondisplaced femoral neck fractures in elderly patients: a retrospective study. *Injury*. Apr 2020;51(4):1021-1024. doi:10.1016/j.injury.2020.02.098

43. Cintean R, Pankratz C, Hofmann M, Gebhard F, Schütze K. Early Results in Non-Displaced Femoral Neck Fractures Using the Femoral Neck System. *Geriatric orthopaedic surgery & rehabilitation*. 2021;12:21514593211050153. doi:10.1177/21514593211050153
44. Davidson A, Blum S, Harats E, et al. Neck of femur fractures treated with the femoral neck system: outcomes of one hundred and two patients and literature review. *International orthopaedics*. 2022-09-01 46(9)doi:10.1007/s00264-022-05414-0
45. Elgeidi A, El Negery A, Abdellatif MS, El Moghazy N. Dynamic hip screw and fibular strut graft for fixation of fresh femoral neck fracture with posterior comminution. *Arch Orthop Trauma Surg*. 2017-01-01 137(10)doi:10.1007/s00402-017-2758-z
46. Elmi A, Tabrizi A, Rouhani A, Mirzadolouei F. Long-term follow-up results of delayed fixation of femoral neck fractures in adults. *Trauma monthly*. Spring 2013;18(1):8-11. doi:10.5812/traumamon.11275
47. Enrietti E, Aprato A, Bellomo L, et al. Femoral neck fracture treated with cannulated screws: Is reduction the key point? *J Musculoskelet Res*. 2019-01-01 22(3-4)doi:10.1142/s0218957719500106
48. Galal S, Nagy M. Non-parallel screw fixation for femoral neck fractures in young adults. *Journal of clinical orthopaedics and trauma*. Jul-Sep 2017;8(3):220-224. doi:10.1016/j.jcot.2017.07.003
49. Gruszka D, Dietz SO, Brodt R, Wagner D, Rommens PM, Kuechle R. Results Of The Treatment Of Intracapsular Femoral Neck Fractures With A New Dynamic Locking Plate. *Acta orthopaedica Belgica*. Dec 2017;83(4):536-543.
50. Gumustas S, Tosun HB, Isyar M, Serbest S, Oznam K, Bulut G. Femur neck fracture in young adults, is it really an urgent surgery indication: retrospective clinical study. *The Pan African medical journal*. 2018;30:112. doi:10.11604/pamj.2018.30.112.13643
51. Han Z, Taxi W, Jia H, et al. Multiple cannulated screw fixation of femoral neck fractures with comminution in young- and middle-aged patients. *J Orthop Surg Res*. 2022-05-18 17(1)doi:10.1186/s13018-022-03157-7
52. He M, Han W, Zhao CP, et al. Evaluation of a Bi-Planar Robot Navigation System for Insertion of Cannulated Screws in Femoral Neck Fractures. *Orthop Surg*. Jun 2019;11(3):373-379. doi:10.1111/os.12450
53. He C, Lu Y, Wang Q, et al. Comparison of the clinical efficacy of a femoral neck system versus cannulated screws in the treatment of femoral neck fracture in young adults. *BMC musculoskeletal disorders*. Nov 29 2021;22(1):994. doi:10.1186/s12891-021-04888-0
54. Hiranaka T, Tanaka T, Okumura K, et al. Clinical Results of Dual SC Screw: A Mini-Sliding Hip Screw with an Anti-rotating Screw for Femoral Neck Fractures. *Clinics in orthopedic surgery*. Dec 2021;13(4):449-455. doi:10.4055/cios20202
55. Hu H, Cheng J, Feng M, Gao Z, Wu J, Lu S. Clinical outcome of femoral neck system versus cannulated compression screws for fixation of femoral neck fracture in younger patients. *J Orthop Surg Res*. Jun 9 2021;16(1):370. doi:10.1186/s13018-021-02517-z
56. Huang K, Fang X, Li G, Yue J. Assessing the effect of Gotfried reduction with positive buttress pattern in the young femoral neck fracture. *J Orthop Surg Res*. Nov 7 2020;15(1):511. doi:10.1186/s13018-020-02039-0
57. Huang Z-Y, Su Y-H, Huang Z-P, et al. Medial Buttress Plate and Allograft Bone-Assisted Cannulated Screw Fixation for Unstable Femoral Neck Fracture with Posteromedial Comminution: A Retrospective Controlled Study. *Orthop Surg*. 2022-05-01 14(5)doi:10.1111/os.13273

58. Jettoo P, James P. Dynamic hip screw fixation versus multiple screw fixation for intracapsular hip fracture. *Journal of orthopaedic surgery (Hong Kong)*. Aug 2016;24(2):146-9. doi:10.1177/1602400204
59. Jin Z-Y, Gu C, Yang H-L, Xu M. Outcome of percutaneous compression plate for treatment of femoral neck fractures: mean follow-up of 4.4 years. *International orthopaedics*. 2022-08-01 46(8)doi:10.1007/s00264-022-05405-1
60. Ju FX, Hou RX, Xiong J, Shi HF, Chen YX, Wang JF. Outcomes of Femoral Neck Fractures Treated with Cannulated Internal Fixation in Elderly Patients: A Long-Term Follow-Up Study. *Orthop Surg*. Jun 2020;12(3):809-818. doi:10.1111/os.12683
61. Kain MS, Marcantonio AJ, Iorio R. Revision surgery occurs frequently after percutaneous fixation of stable femoral neck fractures in elderly patients. *Clinical orthopaedics and related research*. Dec 2014;472(12):4010-4. doi:10.1007/s11999-014-3957-3
62. Kalsbeek JH, van Walsum ADP, Vroemen J, et al. Displaced femoral neck fractures in patients 60 years of age or younger: results of internal fixation with the dynamic locking blade plate. *The bone & joint journal*. Apr 1 2018;100-b(4):443-449. doi:10.1302/0301-620x.100b4.Bjj-2016-1098.R3
63. Kang JS, Moon KH, Shin JS, Shin EH, Ahn CH, Choi GH. Clinical Results of Internal Fixation of Subcapital Femoral Neck Fractures. *Clinics in orthopedic surgery*. Jun 2016;8(2):146-52. doi:10.4055/cios.2016.8.2.146
64. Khoo C, Haseeb A, Ajit Singh V. Cannulated Screw Fixation For Femoral Neck Fractures : A 5-year Experience In A Single Institution. *Malaysian orthopaedic journal*. Jul 2014;8(2):14-21. doi:10.5704/moj.1407.010
65. Kilian M, Csörgő P, Šajter M, Šimkovic P, Vajcziková S, Zamborský R. Locking Plate Fixation with Multiple Telescoping Sliding Screws for Femoral Neck Fractures. *Ortopedia, traumatologia, rehabilitacja*. Dec 31 2018;20(6):493-498.
66. Kim JW, Byun SE, Chang JS. The clinical outcomes of early internal fixation for undisplaced femoral neck fractures and early full weight-bearing in elderly patients. *Archives of orthopaedic and trauma surgery*. Jul 2014;134(7):941-6. doi:10.1007/s00402-014-2003-y
67. Kim JY, Kong GM, Park DH, Kim DY. Multiple cannulated screw fixation of young femoral neck fractures. *Pakistan journal of medical sciences*. Nov-Dec 2015;31(6):1517-20. doi:10.12669/pjms.316.8356
68. Kosola J, Kaipia A, Laitinen MK, Nieminen J. Complications after surgical treatment of femoral neck fractures in men with alcohol dependence syndrome: retrospective register analysis of 154 cases. *Archives of orthopaedic and trauma surgery*. Jul 2017;137(7):967-973. doi:10.1007/s00402-017-2713-z
69. Lin S, Li J, Wang R, et al. The effect of anteromedial support plate with three cannulated screws in the treatment of Pauwels type III femoral neck fracture in young adults. *European Journal of Trauma and Emergency Surgery*. 2022/03/15 2022;doi:10.1007/s00068-022-01931-0
70. Ma C, Liu Y, Liu J, et al. The role of the medial buttress plate in the treatment of Pauwels type II and III femoral neck fracture in nonelderly patients: a retrospective study and preliminary results. *BMC musculoskeletal disorders*. 2022-01-31 23(1)doi:10.1186/s12891-022-05056-8
71. Makki D, Mohamed AM, Gadiyar R, Patterson M. Addition of an anti-rotation screw to the dynamic hip screw for femoral neck fractures. *Orthopedics*. Jul 2013;36(7):e865-8. doi:10.3928/01477447-20130624-15

72. Manohara R, Liang S, Huang D, Krishna L. Cancellous screw fixation for undisplaced femoral neck fractures in the elderly. *Journal of orthopaedic surgery (Hong Kong)*. Dec 2014;22(3):282-6. doi:10.1177/230949901402200303
73. Mubark I, Nafady M, Motawea BA. Locking Plate Fixation System for Intracapsular Fracture Neck of Femur in Young Patients. *Ortopedia, traumatologia, rehabilitacija*. Feb 28 2021;23(1):27-32. doi:10.5604/01.3001.0014.7565
74. Mue D, Salihi M, Awonusi F, Yongu W, Kortor J, Elachi I. Outcome of treatment of fracture neck of femur using hemiarthroplasty versus dynamic hip screw. *Journal of the West African College of Surgeons*. Apr 2013;3(2):27-45.
75. Mukka S, Sjöholm P, Aziz A, et al. A cohort study comparing internal fixation for undisplaced versus hip arthroplasty for displaced femoral neck fracture in the elderly: a pilot study for a clinical trial. *Pilot and feasibility studies*. 2020;6:98. doi:10.1186/s40814-020-00642-w
76. Nibe Y, Matsumura T, Takahashi T, Kubo T, Matsumoto Y, Takeshita K. A comparison between the femoral neck system and other implants for elderly patients with femoral neck fracture: A preliminary report of a newly developed implant. *Journal of orthopaedic science : official journal of the Japanese Orthopaedic Association*. Jun 2 2021;doi:10.1016/j.jos.2021.04.016
77. Niemann M, Braun KF, Ahmad SS, Stöckle U, Märdian S, Graef F. Comparing Perioperative Outcome Measures of the Dynamic Hip Screw and the Femoral Neck System. *Medicina (Kaunas)*. 2022-02-26 58(3)doi:10.3390/medicina58030352
78. Osarumwense D, Tissingh E, Wartenberg K, et al. The Targon FN system for the management of intracapsular neck of femur fractures: minimum 2-year experience and outcome in an independent hospital. *Clinics in orthopedic surgery*. Mar 2015;7(1):22-8. doi:10.4055/cios.2015.7.1.22
79. Parker M, Cawley S, Palial V. Internal fixation of intracapsular fractures of the hip using a dynamic locking plate: Two-year follow-up of 320 patients. *The bone & joint journal*. Oct 2013;95-b(10):1402-5. doi:10.1302/0301-620x.95b10.31511
80. Patterson JT, Ishii K, Tornetta P, 3rd, et al. Open Reduction Is Associated With Greater Hazard of Early Reoperation After Internal Fixation of Displaced Femoral Neck Fractures in Adults 18-65 Years. *Journal of orthopaedic trauma*. Jun 2020;34(6):294-301. doi:10.1097/bot.0000000000001711
81. Qiu L, Huang Y, Li G, Wu H, Zhang Y, Zhang Z. Essential role of reliable reduction quality in internal fixation of femoral neck fractures in the non-elderly patients-a propensity score matching analysis. *BMC musculoskeletal disorders*. 2022-04-11 23(1)doi:10.1186/s12891-022-05307-8
82. Riaz O, Arshad R, Nisar S, Vanker R. Serum albumin and fixation failure with cannulated hip screws in undisplaced intracapsular femoral neck fracture. *Annals of the Royal College of Surgeons of England*. Jul 2016;98(6):376-9. doi:10.1308/rcsann.2016.0124
83. Schuetze K, Burkhardt J, Pankratz C, et al. Is new always better: comparison of the femoral neck system and the dynamic hip screw in the treatment of femoral neck fractures. *Archives of orthopaedic and trauma surgery*. 2022-07-22 None(None)doi:10.1007/s00402-022-04551-w

84. Schwartsmann CR, Lammerhirt HM, Spinelli LF, Ungaretti Neto ADS. Treatment of displaced femoral neck fractures in young patients with DHS and its association to osteonecrosis. *Revista brasileira de ortopedia*. Jan-Feb 2018;53(1):82-87. doi:10.1016/j.rboe.2017.03.003
85. Shields E, Kates SL. Revision rates and cumulative financial burden in patients treated with hemiarthroplasty compared to cannulated screws after femoral neck fractures. *Archives of orthopaedic and trauma surgery*. Dec 2014;134(12):1667-71. doi:10.1007/s00402-014-2096-3
86. Sjöholm P, Sundkvist J, Wolf O, Sköldenberg O, Gordon M, Mukka S. Preoperative Anterior and Posterior Tilt of Garden I-II Femoral Neck Fractures Predict Treatment Failure and Need for Reoperation in Patients Over 60 Years. *JB & JS open access*. Oct-Dec 2021;6(4)doi:10.2106/jbjs.Oa.21.00045
87. Stassen RC, Jeuken RM, Boonen B, Meesters B, de Loos ER, van Vugt R. First clinical results of 1-year follow-up of the femoral neck system for internal fixation of femoral neck fractures. *Archives of orthopaedic and trauma surgery*. 2021-11-03 None(None)doi:10.1007/s00402-021-04216-0
88. Sundkvist J, Sjöholm P, Pejic A, et al. Clinical outcomes of patients with Garden I and II femoral neck fractures as verified on MRI: a retrospective case series. *BMC musculoskeletal disorders*. 2022-02-12 23(1)doi:10.1186/s12891-022-05088-0
89. Takigawa N, Yasui K, Eshiro H, et al. Clinical results of surgical treatment for femoral neck fractures with the Targon(®) FN. *Injury*. Dec 2016;47 Suppl 7:S44-s48. doi:10.1016/s0020-1383(16)30854-3
90. Tang Y, Zhang Z, Wang L, Xiong W, Fang Q, Wang G. Femoral neck system versus inverted cannulated cancellous screw for the treatment of femoral neck fractures in adults: a preliminary comparative study. *J Orthop Surg Res*. Aug 16 2021;16(1):504. doi:10.1186/s13018-021-02659-0
91. Vazquez O, Gamulin A, Hannouche D, Belaieff W. Osteosynthesis of non-displaced femoral neck fractures in the elderly population using the femoral neck system (FNS): short-term clinical and radiological outcomes. *J Orthop Surg Res*. Aug 4 2021;16(1):477. doi:10.1186/s13018-021-02622-z
92. Wan L, Zhang X, Wu D, et al. Application of Robot Positioning for Cannulated Screw Internal Fixation in the Treatment of Femoral Neck Fracture: Retrospective Study. *JMIR medical informatics*. Jan 21 2021;9(1):e24164. doi:10.2196/24164
93. Wang T, Sun JY, Zha GC, Jiang T, You ZJ, Yuan DJ. Analysis of risk factors for femoral head necrosis after internal fixation in femoral neck fractures. *Orthopedics*. Dec 2014;37(12):e1117-23. doi:10.3928/01477447-20141124-60
94. Wang SH, Yang JJ, Shen HC, Lin LC, Lee MS, Pan RY. Using a modified Pauwels method to predict the outcome of femoral neck fracture in relatively young patients. *Injury*. Oct 2015;46(10):1969-74. doi:10.1016/j.injury.2015.06.016
95. Wang Z, Yin Y, Li Q, et al. Comparison of early complications between the use of a cannulated screw locking plate and multiple cancellous screws in the treatment of displaced intracapsular hip fractures in young adults: a randomized controlled clinical trial. *J Orthop Surg Res*. Aug 13 2018;13(1):201. doi:10.1186/s13018-018-0901-3
96. Wang XD, Lan H, Li KN. Treatment of Femoral Neck Fractures with Cannulated Screw Invasive Internal Fixation Assisted by Orthopaedic Surgery Robot Positioning System. *Orthop Surg*. Oct 2019;11(5):864-872. doi:10.1111/os.12548

97. Wang W, Li Y, Xiong Z, et al. Effect of the Number, Size, and Location of Cannulated Screws on the Incidence of Avascular Necrosis of the Femoral Head in Pediatric Femoral Neck Fractures: A Review of 153 Cases. *J Pediatr Orthop*. 2022-03-01 42(3)doi:10.1097/bpo.0000000000002018
98. Wenbo Z, Lei L. Effect of dynamic hip system blade on the treatment of femoral neck fractures in elderly patients with osteoporosis. *Chin J Traumatol Eng Ed*. 2014-01-01 17(5)doi:10.3760/cma.j.issn.1008-1275.2014.05.005
99. Wenbo Z, Lei L, Hui Z, Yue F, Fuxing P, Tianfu Y. Effect of dynamic hip screw on the treatment of femoral neck fracture in the elderly. *Chin J Traumatol Eng Ed*. 2014-01-01 17(2)doi:10.3760/cma.j.issn.1008-1275.2014.02.002
100. Xiao YP, Shu DP, Bei MJ, Ji T, Kan WS, Li SG. The clinical application of a novel method of internal fixation for femoral neck fractures-dynamic locking compression system. *J Orthop Surg Res*. May 31 2018;13(1):131. doi:10.1186/s13018-018-0827-9
101. Xu X, Fan J, Zhou F, et al. Comparison of femoral neck system to multiple cancellous screws and dynamic hip screws in the treatment of femoral neck fractures. *Injury*. 2022-03-01 None(None)doi:10.1016/j.injury.2022.03.041
102. Xu X, Lv Y, Cui Z, et al. Non-sliding Fixation Shows Improved Clinical Outcomes for Displaced Femoral Neck Fractures as Compared to Sliding Fixation. *Front Surg*. 2022-01-01 9(None)doi:10.3389/fsurg.2022.826159
103. Yang L, Li Y, Qi L, Xie W, Chen Y. A localization method for guide pin insertion points in the treatment of femoral neck fracture with closed reduction and percutaneous cannulated screw fixation. *Ann Transl Med*. 2022-05-01 10(10)doi:10.21037/atm-22-937
104. Ye Y, Chen K, Tian K, Li W, Mauffrey C, Hak DJ. Medial buttress plate augmentation of cannulated screw fixation in vertically unstable femoral neck fractures: Surgical technique and preliminary results. *Injury*. Oct 2017;48(10):2189-2193. doi:10.1016/j.injury.2017.08.017
105. Yoon HK, Ryu YK, Song DG, Yoon BH. Femoral neck stress fractures in south korean male military recruits. *CIOS Clin Orthop Surg*. 2021-01-01 13(1)doi:10.4055/cios20074
106. Yoshikawa R, Hiranaka T, Kamenaga T, Niikura T, Sakai Y, Kuroda R. TresLock for Unstable Proximal Femoral Fractures: Morphological Compatibility and Clinical Results: A Case Series. *J Orthop Case Rep*. Feb 2022;12(2):49-52. doi:10.13107/jocr.2022.v12.i02.2662
107. Yuan K-X, Yang F, Fu K, et al. Internal fixation using fully threaded cannulated compression screws for fresh femoral neck fractures in adults. *J Orthop Surg Res*. 2022-02-20 17(1)doi:10.1186/s13018-022-03005-8
108. Zhang Y-Z, Lin Y, Li C, et al. A Comparative Analysis of Femoral Neck System and Three Cannulated Screws Fixation in the Treatment of Femoral Neck Fractures: A Six-Month Follow-Up. *Orthop Surg*. 2022-02-18 None(None)doi:10.1111/os.13235
109. Zhao W, Liu L, Zhang H, Fang Y, Pei F, Yang T. Effect of dynamic hip screw on the treatment of femoral neck fracture in the elderly. *Chinese journal of traumatology = Zhonghua chuang shang za zhi*. Apr 1 2014;17(2):69-72.
110. Zhao W, Liu L. Effect of dynamic hip system blade on the treatment of femoral neck fractures in elderly patients with osteoporosis. *Chinese journal of traumatology = Zhonghua chuang shang za zhi*. 2014;17(5):275-8.

111. Zhao F, Guo L, Wang X, Zhang Y. Analysis on risk factors for neck shortening after internal fixation for Pauwels II femoral neck fracture in young patients. *Eur J Med Res*. 2021-06-24 26(1)doi:10.1186/s40001-021-00531-9
112. Zhou XQ, Li ZQ, Xu RJ, et al. Comparison of Early Clinical Results for Femoral Neck System and Cannulated Screws in the Treatment of Unstable Femoral Neck Fractures. *Orthop Surg*. Aug 2021;13(6):1802-1809. doi:10.1111/os.13098
113. Zhu ZD, Xiao CW, Tan B, et al. TiRobot-Assisted Percutaneous Cannulated Screw Fixation in the Treatment of Femoral Neck Fractures: A Minimum 2-Year Follow-up of 50 Patients. *Orthop Surg*. Feb 2021;13(1):244-252. doi:10.1111/os.12915
114. Zhu J, Li Y, Zhang Y, Cheng X. Clinical Outcome and Biomechanical Analysis of Dynamic Hip Screw Combined with Derotation Screw in Treating Displaced Femoral Neck Fractures Based on Different Reduction Qualities in Young Patients ( $\leq 65$  Years of Age). *BioMed research international*. 2022;2022:9505667. doi:10.1155/2022/9505667
115. Zhu J, Deng X, Hu H, Cheng X, Tan Z, Zhang Y. Comparison of the Effect of Rhombic and Inverted Triangle Configurations of Cannulated Screws on Internal Fixation of Nondisplaced Femoral Neck Fractures in Elderly Patients. *Orthop Surg*. 2022-03-18 None(None)doi:10.1111/os.13223
116. Zhuang L, Wang L, Xu D, Wang Z. Anteromedial femoral neck plate with cannulated screws for the treatment of irreducible displaced femoral neck fracture in young patients: a preliminary study. *European journal of trauma and emergency surgery : official publication of the European Trauma Society*. Dec 2019;45(6):995-1002. doi:10.1007/s00068-018-0972-1
117. Faisham WI, Munajat I, Salim AA. Femoral Neck Non-union Treated using Compression Screw with or without Gluteus Medius Trochanteric Flap: A Case Series of Ten patients. *Malays Orthop J*. 2021-01-01 15(3)doi:10.5704/moj.2111.023
118. Schuetze K, Burkhardt J, Pankratz C, et al. Is new always better: comparison of the femoral neck system and the dynamic hip screw in the treatment of femoral neck fractures. *Archives of orthopaedic and trauma surgery*. Jul 22 2022;doi:10.1007/s00402-022-04551-w
